# Supplementary material for: Discovery of 4-arylthiophene-3-carboxylic acid as inhibitor of ANO1 and its effect as analgesic agent
Source: PubMed Central journal article supplement — Acta Pharm Sin B. 2020 Nov 17;11(7):1947–64. doi: 10.1016/j.apsb.2020.11.004 (PMC8343189; doi:10.1016/j.apsb.2020.11.004), 2020-11-17

## Supporting Information for

### Original article

## Discovery of 4-arylthiophene-3-carboxylic acid as inhibitor of ANO1 and its effect as analgesic agent

Yuxi Wang<sup>a,†</sup>, Jian Gao<sup>a,†</sup>, Song Zhao<sup>b</sup>, Yan Song<sup>a</sup>, Han Huang<sup>a</sup>, Guiwang Zhu<sup>a</sup>, Peili Jiao<sup>a</sup>, Xiangqing Xu<sup>b</sup>, Guisen Zhang<sup>c</sup>, Kewei Wang<sup>d,\*</sup>, Liangren Zhang<sup>a,\*</sup>, Zhenming Liu<sup>a,\*</sup>

<sup>a</sup>*State Key Laboratory of Natural and Biomimetic Drugs, School of Pharmaceutical Sciences, Peking University, Beijing 100191, China*

<sup>b</sup>*Jiangsu Nhwa Pharmaceutical Co., Ltd., Xuzhou 221116, China*

<sup>c</sup>*College of life science and technology, Jiangsu Ocean University, Lianyungang 222005, China*

<sup>d</sup>*Department of Pharmacology, School of Pharmacy, Qingdao University, Qingdao 266021, China*

<sup>†</sup>These authors made equal contributions to this work.

Received 13 September 2020; received in revised form 26 October 2020; accepted 4 November 2020

\*Corresponding authors. Tel: +86 532 82991070 (Kewei Wang), +86 10 82802567 (Liangren Zhang), +86 10 82805281 (Zhenming Liu).

E-mail addresses: wangkw@qdu.edu.cn (wangkw@qdu.edu.cn), liangren@bjmu.edu.cn (Liangren Zhang), zmliu@bjmu.edu.cn (Zhenming Liu).

### Content

**Figure S1** Structures of other compounds in shape and electronic distribution based virtual screening.

**Figure S2** ANO1 inhibitory rate–concentration curve.

**Figure S3** Hot plate test.

**Figure S4** Writhing test.

**Figure S5** ANO1 homology modeling

**Table S1** ANO1 inhibitory activity of other compounds in shape and electronic distribution based virtual screening.

### Structure characterization

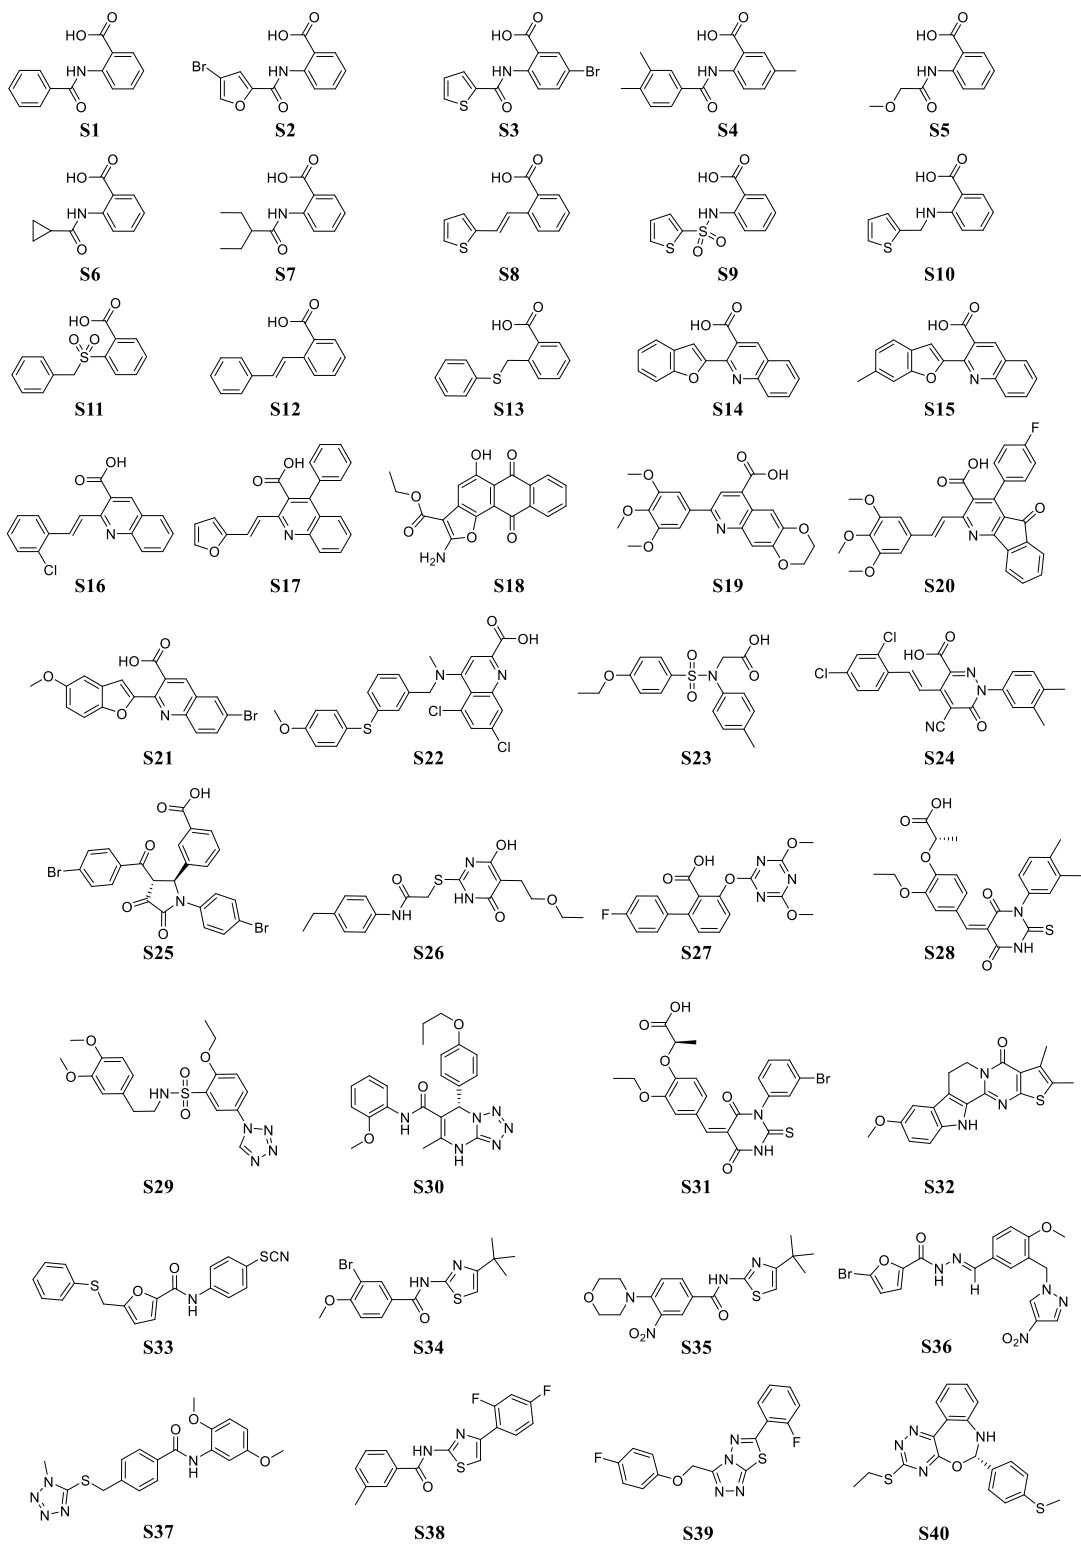

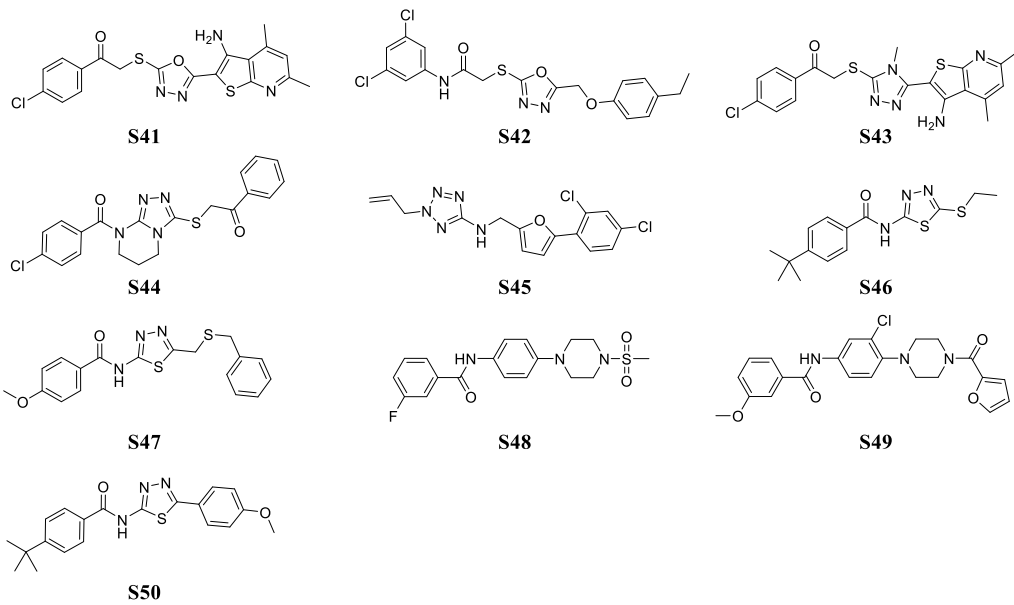

**Figure S1** Structures of other compounds in shape and electronic distribution based virtual screening.



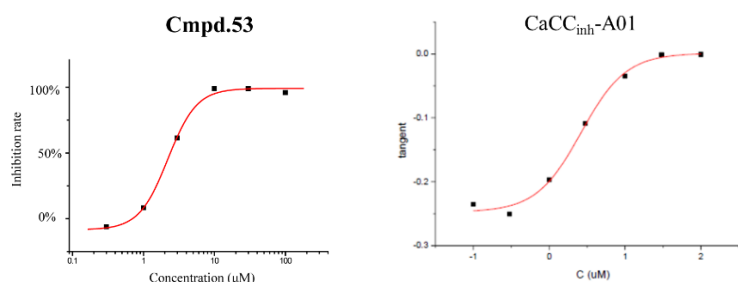

**Figure S2** ANO1 inhibitory rate–concentration curve. Compounds **35** and **38** are not represented here because of no significant inhibition effect observed in 100  $\mu\text{mol/L}$  concentration.

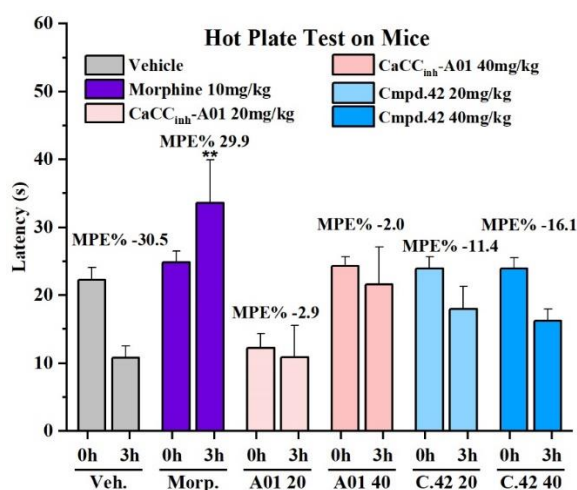

**Figure S3** Hot plate test on mice;  $n=10$ . The vehicle group was treated with saline by i.g. administration instead of the corresponding compound solution. MPE, maximal possible effect (%). All data are represented by the mean  $\pm$  SD. Statistical significance was determined by ANOVA, \*\* $P<0.01$  vs. vehicle.

In the hot plate test, the latency of pain response appearing (foot licking or jumping) was measured before and 3 h after compound administration. As shown in Fig. S3, the latency of morphine group was significantly prolonged after 10 mg/kg morphine i.p. injection and its maximal possible effect (MPE, %) was about 30. However, no obvious differences in pain response latency were observed among vehicle group, 20 and 40 mg/kg CaCC<sub>inh</sub>-A01 group, and 20 mg/kg compound **42** group.

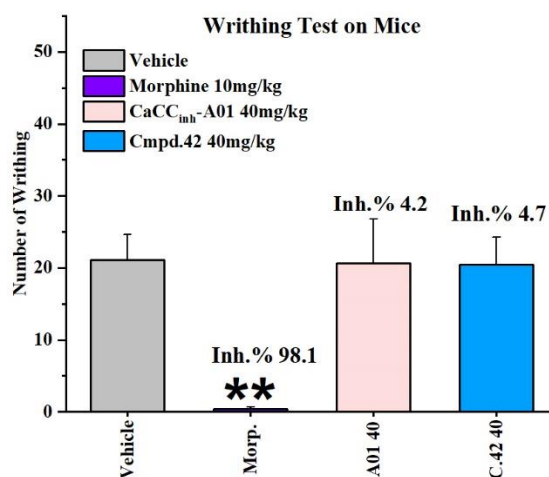

**Figure S4** Writhing test on mice;  $n=10$ . Inh., the inhibition ratio of pain response (number of writhing) in the corresponding compound group against the vehicle group. All data are represented by the mean  $\pm$  SD. Statistical significance was determined by ANOVA,  $**P<0.01$  compared to vehicle.

In writhing test (Fig. S4), 0.6% (v/v) acetic acid solution was i.p. injected 1 h after compound administration, then the number of writhing was measured within 15 min immediately. Morphine (10 mg/kg, i.p.) significantly reduce the number of writhing in mice, the inhibition rate of writhing is about 98%. ANO1 inhibitors CaCC<sub>inh</sub>-A01 (20 and 40 mg/kg) and compound **42** (20 mg/kg) displayed no significant analgesic effect on number of writhing.

**A**

|             | hANO1_H | hANO2_H | hANO3_H | hANO4_H | hANO5_H | hANO6_H | hANO7_H | hANO8_H | hANO9_H | hANO10_H | hANO_A | hANO150YE_A |
|-------------|---------|---------|---------|---------|---------|---------|---------|---------|---------|----------|--------|-------------|
| hANO1_H     | 100     | 56      | 33      | 36      | 34      | 32      | 32      | 10      | 25      | 13       | 12     | 89          |
| hANO2_H     | 56      | 100     | 33      | 34      | 33      | 29      | 31      | 10      | 25      | 13       | 12     | 56          |
| hANO3_H     | 33      | 33      | 100     | 60      | 37      | 37      | 30      | 10      | 28      | 15       | 12     | 33          |
| hANO4_H     | 36      | 34      | 60      | 100     | 38      | 39      | 31      | 10      | 31      | 16       | 13     | 36          |
| hANO5_H     | 34      | 33      | 37      | 38      | 100     | 48      | 31      | 11      | 28      | 16       | 12     | 35          |
| hANO6_H     | 32      | 29      | 37      | 39      | 48      | 100     | 30      | 11      | 27      | 17       | 13     | 33          |
| hANO7_H     | 32      | 31      | 30      | 31      | 31      | 30      | 100     | 11      | 26      | 16       | 13     | 32          |
| hANO8_H     | 10      | 10      | 10      | 10      | 11      | 11      | 11      | 100     | 11      | 15       | 11     | 10          |
| hANO9_H     | 25      | 25      | 28      | 31      | 28      | 27      | 26      | 11      | 100     | 15       | 15     | 25          |
| hANO10_H    | 13      | 13      | 15      | 16      | 16      | 17      | 16      | 15      | 15      | 100      | 16     | 13          |
| hANO_A      | 12      | 12      | 12      | 13      | 12      | 13      | 13      | 11      | 15      | 16       | 100    | 12          |
| hANO150YE_A | 89      | 56      | 33      | 36      | 35      | 33      | 32      | 10      | 25      | 13       | 12     | 100         |

**B**

|               | hANO1_H | hANO2_H | hANO3_H | hANO4_H | hANO5_H | hANO6_H | hANO7_H | hANO8_H | hANO9_H | hANO10_H | rhANO_A | rhANO1_5OYB_A |
|---------------|---------|---------|---------|---------|---------|---------|---------|---------|---------|----------|---------|---------------|
| hANO1_H       | 100     | 70      | 48      | 51      | 50      | 48      | 47      | 20      | 39      | 27       | 25      | 93            |
| hANO2_H       | 70      | 100     | 49      | 51      | 49      | 45      | 48      | 20      | 38      | 26       | 24      | 70            |
| hANO3_H       | 48      | 49      | 100     | 73      | 53      | 53      | 47      | 19      | 41      | 27       | 23      | 48            |
| hANO4_H       | 51      | 51      | 73      | 100     | 57      | 58      | 48      | 20      | 44      | 28       | 24      | 52            |
| hANO5_H       | 50      | 49      | 53      | 57      | 100     | 66      | 47      | 20      | 43      | 29       | 26      | 51            |
| hANO6_H       | 48      | 45      | 53      | 58      | 66      | 100     | 46      | 21      | 45      | 30       | 27      | 49            |
| hANO7_H       | 47      | 48      | 47      | 48      | 47      | 46      | 100     | 20      | 40      | 30       | 25      | 48            |
| hANO8_H       | 20      | 20      | 19      | 20      | 20      | 21      | 20      | 100     | 21      | 24       | 20      | 21            |
| hANO9_H       | 39      | 38      | 41      | 44      | 43      | 45      | 40      | 21      | 100     | 30       | 29      | 40            |
| hANO10_H      | 27      | 26      | 27      | 28      | 29      | 30      | 30      | 24      | 30      | 100      | 31      | 27            |
| rhANO_A       | 25      | 24      | 23      | 24      | 26      | 27      | 25      | 20      | 29      | 31       | 100     | 26            |
| rhANO1_5OYB_A | 93      | 70      | 48      | 52      | 51      | 49      | 48      | 21      | 40      | 27       | 26      | 100           |

**C**

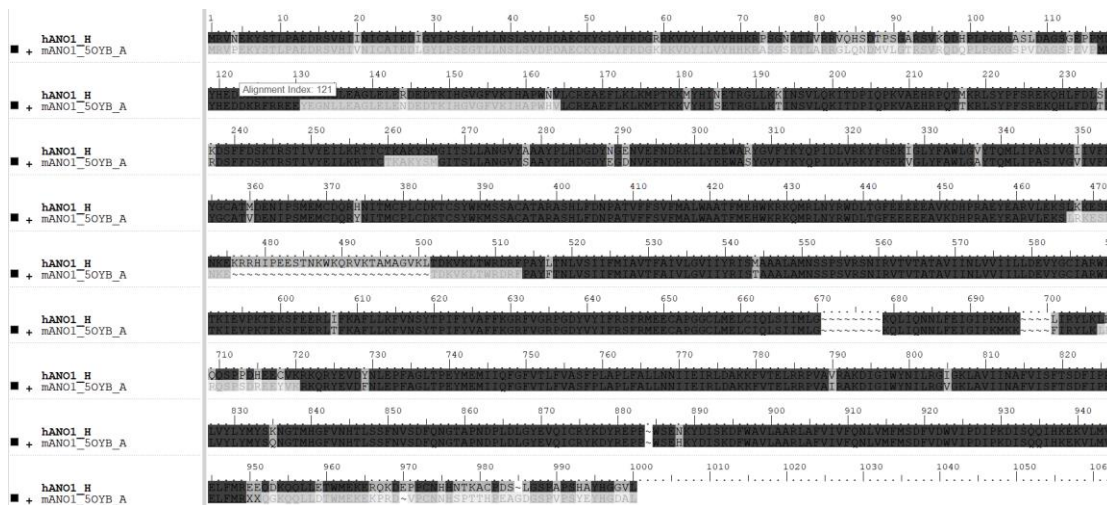

**D**

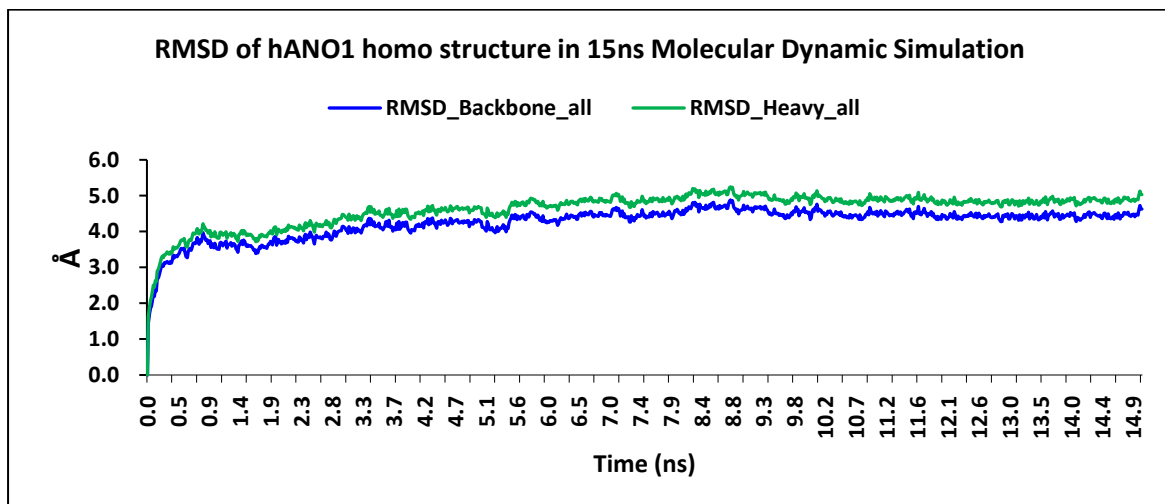

**E**

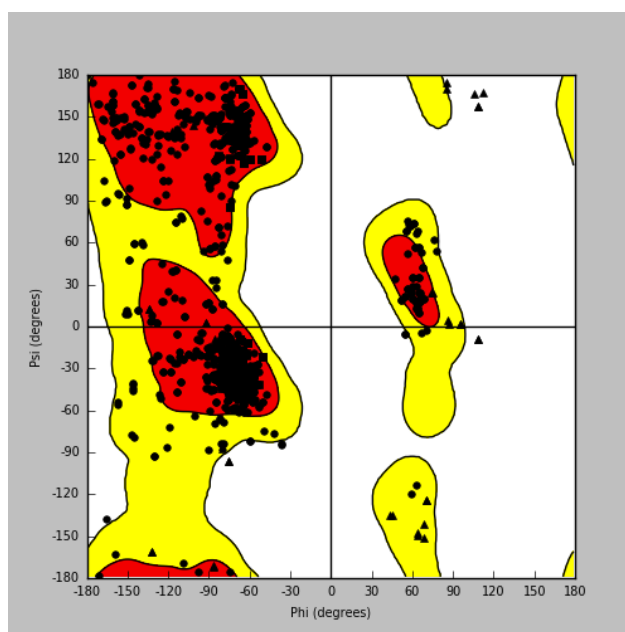

**Figure S5** ANO1 homology modeling. (A) Sequence alignment: identity. (B) Sequence alignment: similarity. (C) Sequence alignment of hANO1 and mANO1. (D) 15 ns molecular dynamic optimization of hANO1 homo structure. (E) Ramachandran plot of hANO1 homo structure (Dimer).



**Table S1** ANO1 inhibitory activity of other compounds in shape and electronic distribution based virtual screening.

| Compd.     | Inh. (%) <sup>a</sup> | Compd.     | Inh. (%) <sup>a</sup> |
|------------|-----------------------|------------|-----------------------|
| <b>S1</b>  | 34.5                  | <b>S26</b> | 15.7                  |
| <b>S2</b>  | 27.7                  | <b>S27</b> | 14.9                  |
| <b>S3</b>  | 88.2                  | <b>S28</b> | 5.6                   |
| <b>S4</b>  | 25.7                  | <b>S29</b> | 1.9                   |
| <b>S5</b>  | -1.1                  | <b>S30</b> | -28.2                 |
| <b>S6</b>  | 22.7                  | <b>S31</b> | 17.5                  |
| <b>S7</b>  | 11.0                  | <b>S32</b> | 17.8                  |
| <b>S8</b>  | 10.5                  | <b>S33</b> | 6.1                   |
| <b>S9</b>  | 26.6                  | <b>S34</b> | 36.0                  |
| <b>S10</b> | 7.0                   | <b>S35</b> | 23.7                  |
| <b>S11</b> | 24.1                  | <b>S36</b> | 27.3                  |
| <b>S12</b> | 28.9                  | <b>S37</b> | 79.2                  |
| <b>S13</b> | 7.2                   | <b>S38</b> | 28.9                  |
| <b>S14</b> | 25.1                  | <b>S39</b> | 31.7                  |
| <b>S15</b> | 28.8                  | <b>S40</b> | 14.9                  |
| <b>S16</b> | 12.6                  | <b>S41</b> | 35.5                  |
| <b>S17</b> | 14.2                  | <b>S42</b> | 14.4                  |
| <b>S18</b> | 19.8                  | <b>S43</b> | 16.0                  |
| <b>S19</b> | -36.7                 | <b>S44</b> | 23.6                  |
| <b>S20</b> | 36.3                  | <b>S45</b> | 60.8                  |
| <b>S21</b> | 18.9                  | <b>S46</b> | 18.0                  |
| <b>S22</b> | 4.3                   | <b>S47</b> | 23.3                  |
| <b>S23</b> | 8.3                   | <b>S48</b> | 16.6                  |
| <b>S24</b> | 61.2                  | <b>S49</b> | 26.9                  |
| <b>S25</b> | 41.5                  | <b>S50</b> | 13.4                  |

<sup>a</sup>Inh. (%) refers to the ANO1 inhibition rate as determined by in whole cell patch clamp recording at 100  $\mu\text{mol/L}$ ;  $n=3$ .

## Structure characterization

$^1\text{H}$  and  $^{13}\text{C}$  NMR spectra were recorded on Bruker (400 MHz) instruments, using DMSO- $d_6$  or  $\text{CDCl}_3$  as solvents. High-resolution mass spectra (HRMS) were recorded on Bruker Apex IV FTMS mass spectrometer using ESI (electrospray ionization).

6-(*tert*-Butyl)-2-(furan-2-carboxamido)-4,5,6,7-tetrahydrobenzo[*b*]thiophene-3-carboxylic acid (CaCC<sub>inh</sub>-A01, **1**)

### $^1\text{H}$ -NMR

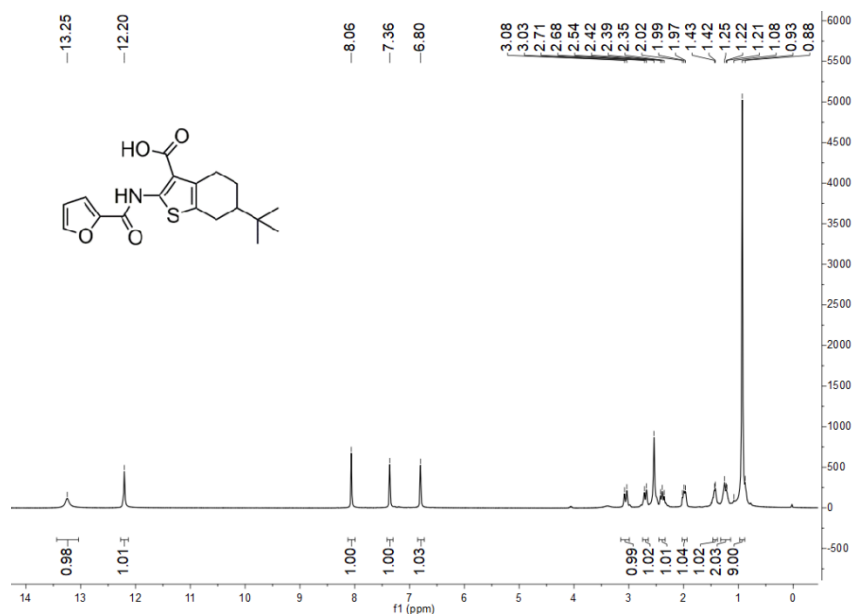

### $^{13}\text{C}$ -NMR

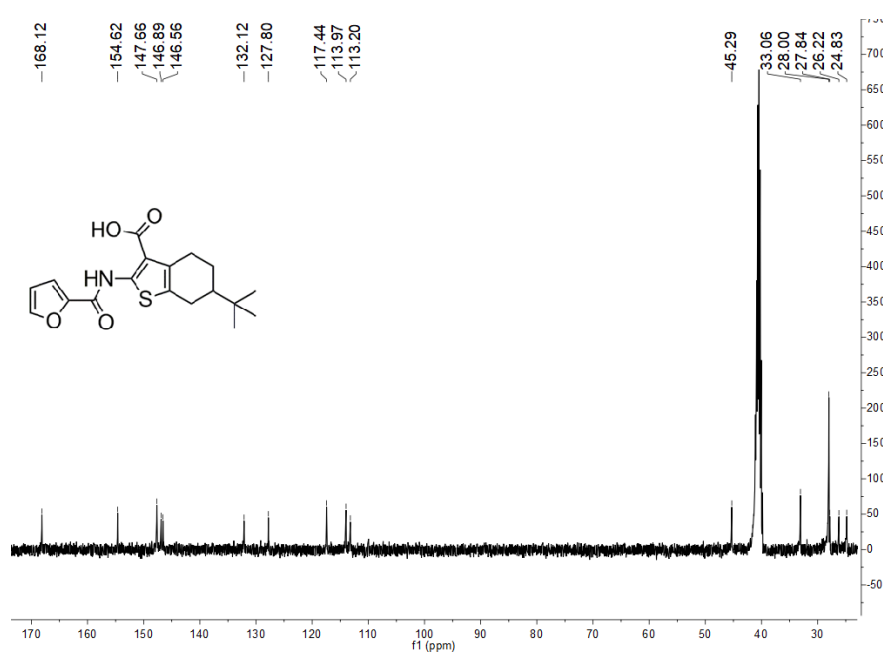

## HRMS

Xevo G2 Q-TOF/YCA166#

36 11 (0.216) Cm (11:15-(2:7+24:54))

10-Apr-2017

Waters

1: TOF MS ES-  
7.40e4

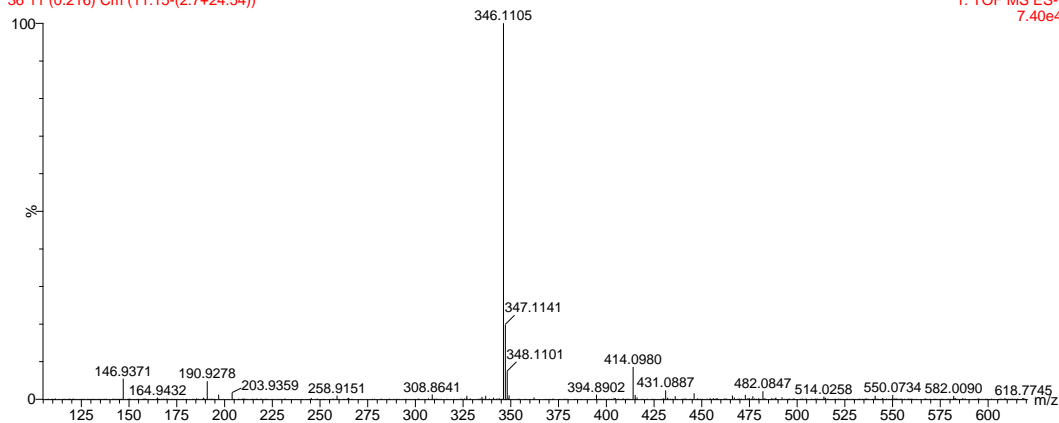

## HPLC

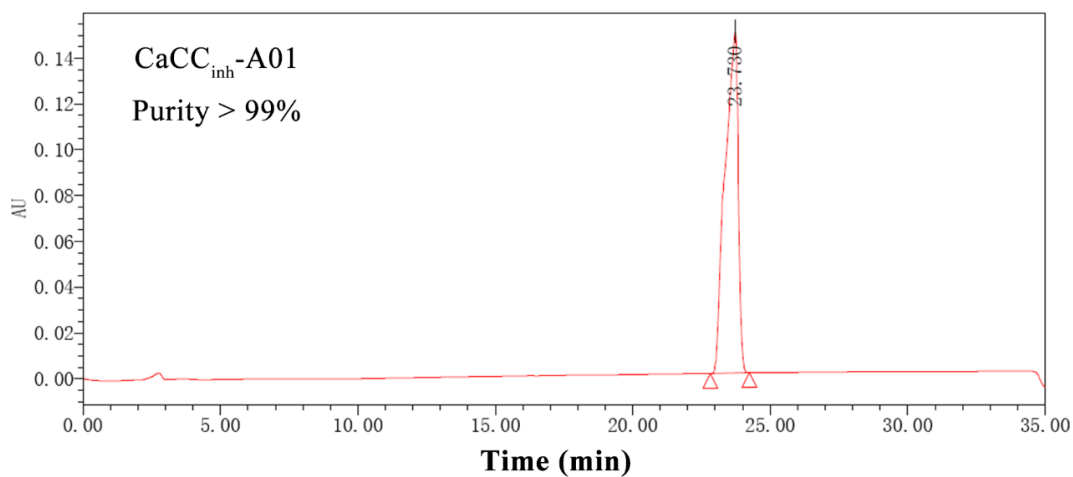

HPLC parameter:

Waters Xbridge C18 column(4.6 mm×250 mm 5 μm i.d.);

Flow rate: 1 mL/min;

Detector: UV 254 nm;

Eluent: A is water containing 0.1%TFA, B is MeOH; 0–5 min: 30% (v/v) A+70% (v/v) B, 25–35 min: 5% (v/v) A+95% (v/v) B.

2-(4-(*tert*-Butyl) benzamido)-4-(4-fluorophenyl) thiophene-3-carboxylic acid (**33**)

<sup>1</sup>H-NMR

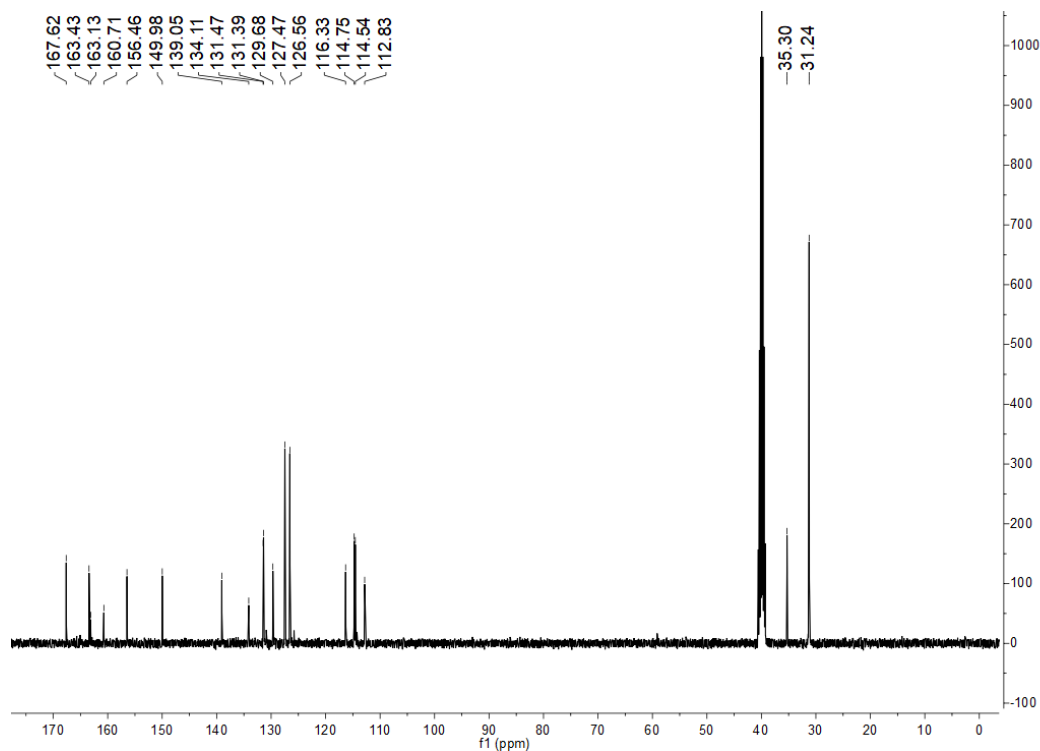

<sup>13</sup>C-NMR

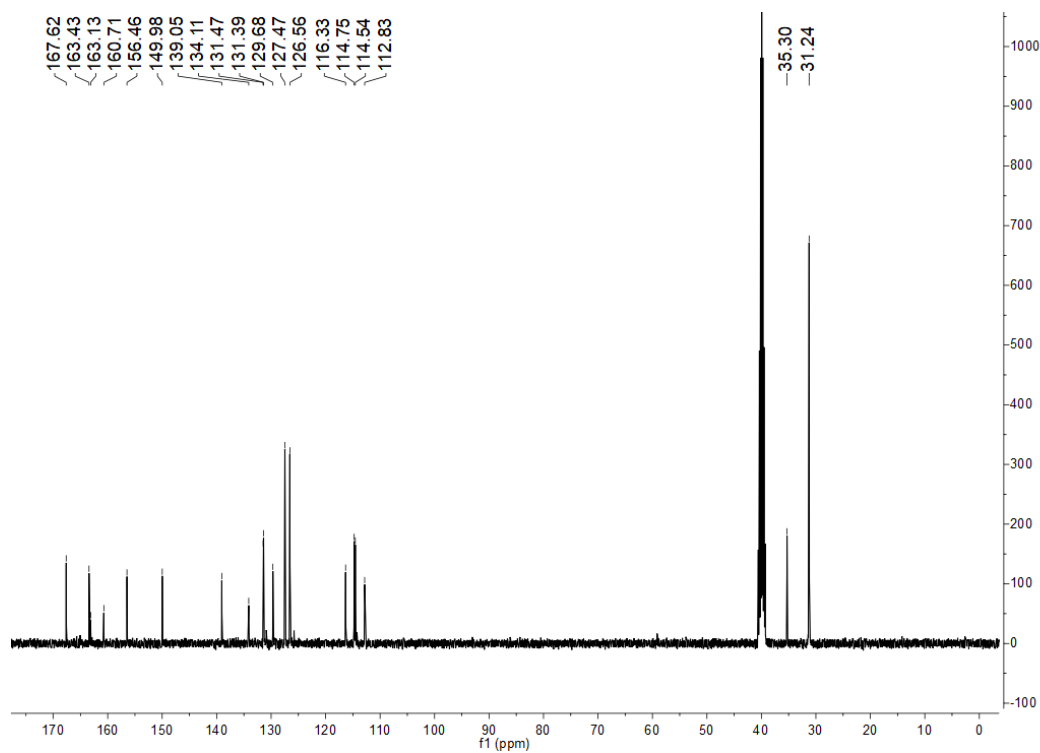

# HRMS

Xevo G2 Q-TOF/YCA166#

267 11 (0.216) Cm (10:15-(1:5+22:52))

10-Apr-2017

Waters  
1: TOF MS ES-  
2.36e5

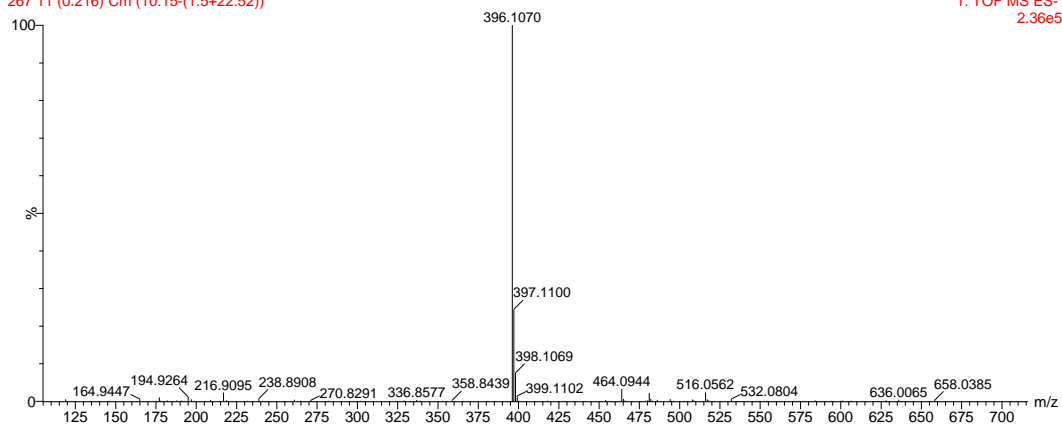

## 2-(4-(*tert*-Butyl) benzamido)-4-(4-chlorophenyl) thiophene-3-carboxylic acid (**34**)

### <sup>1</sup>H-NMR

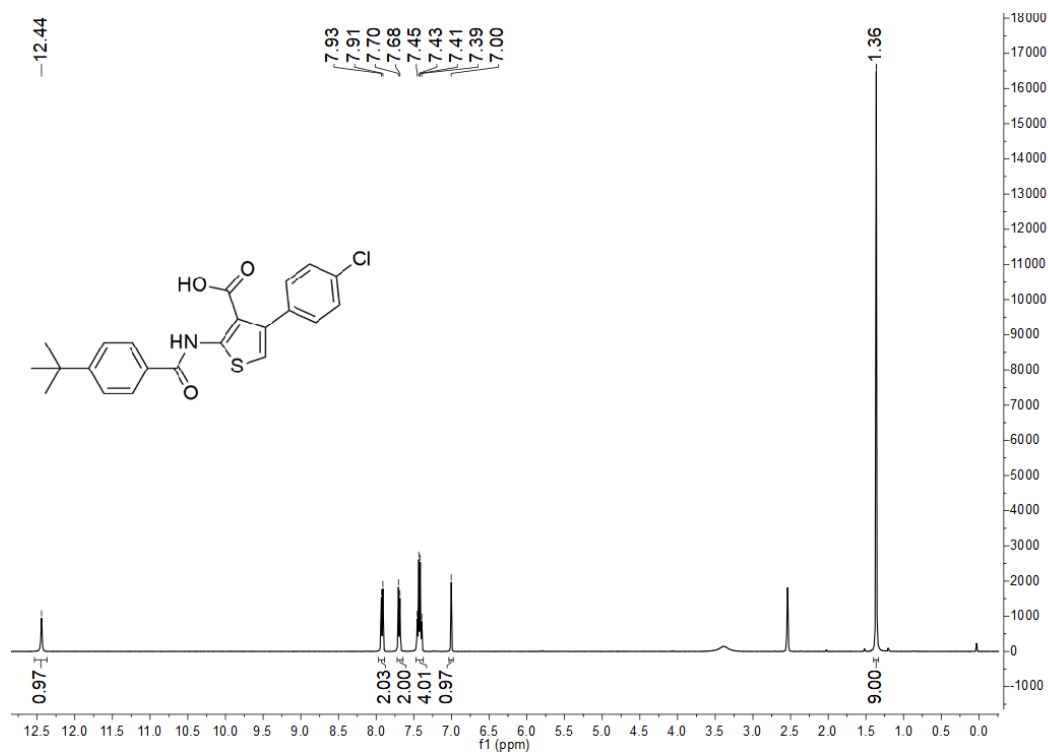

# <sup>13</sup>C-NMR

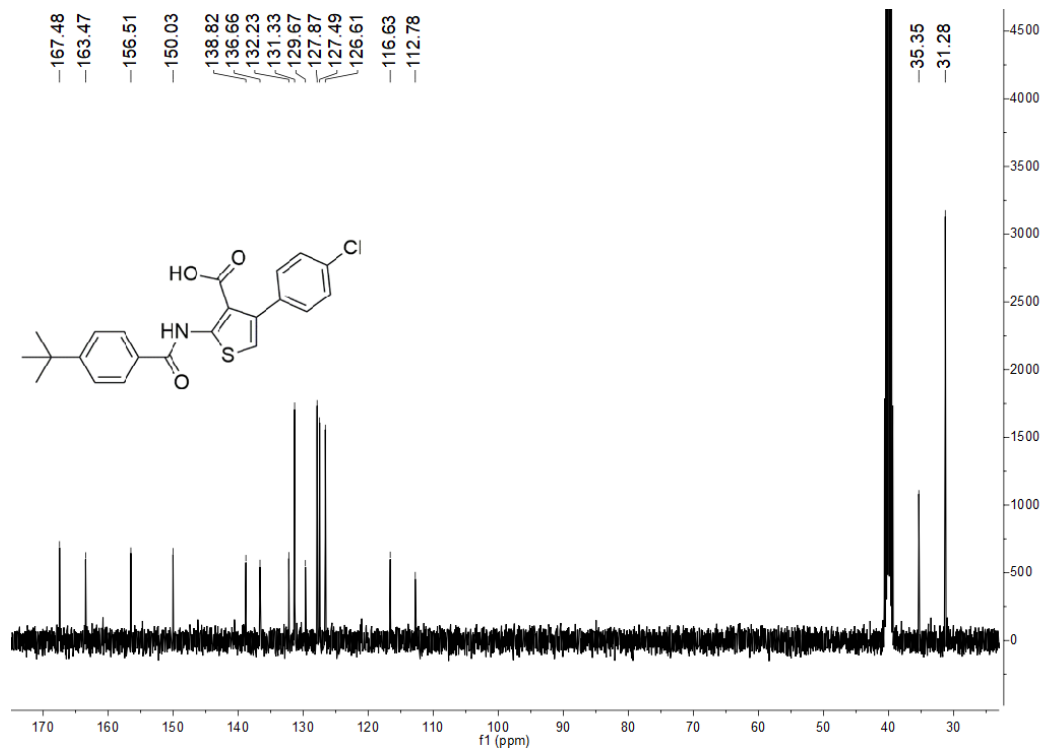

# HRMS

Xevo G2 Q-TOF/YCA166#

254 11 (0.216) Cm (10:14-(2:6+23:53))

10-Apr-2017

Waters

1: TOF MS ES-  
9.64e4

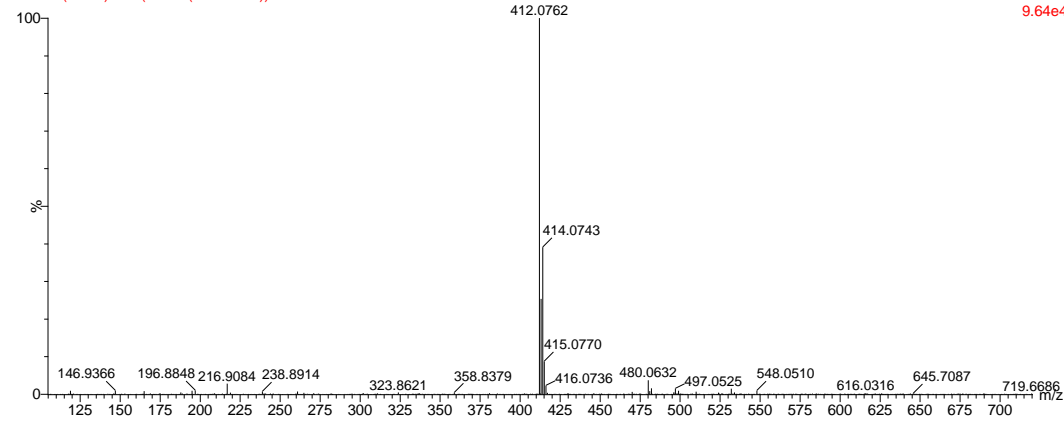

2-(4-(*tert*-Butyl) benzamido)-4-(4-(trifluoromethyl) phenyl) thiophene-3-carboxylic acid (**35**)

<sup>1</sup>H-NMR

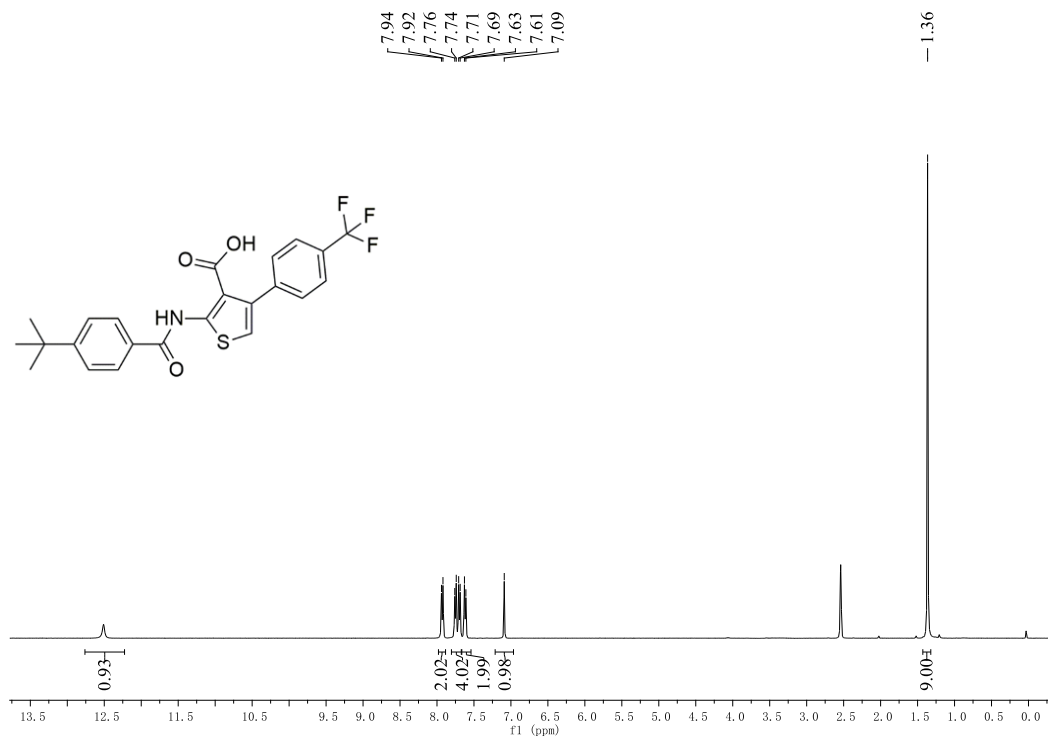

<sup>13</sup>C-NMR

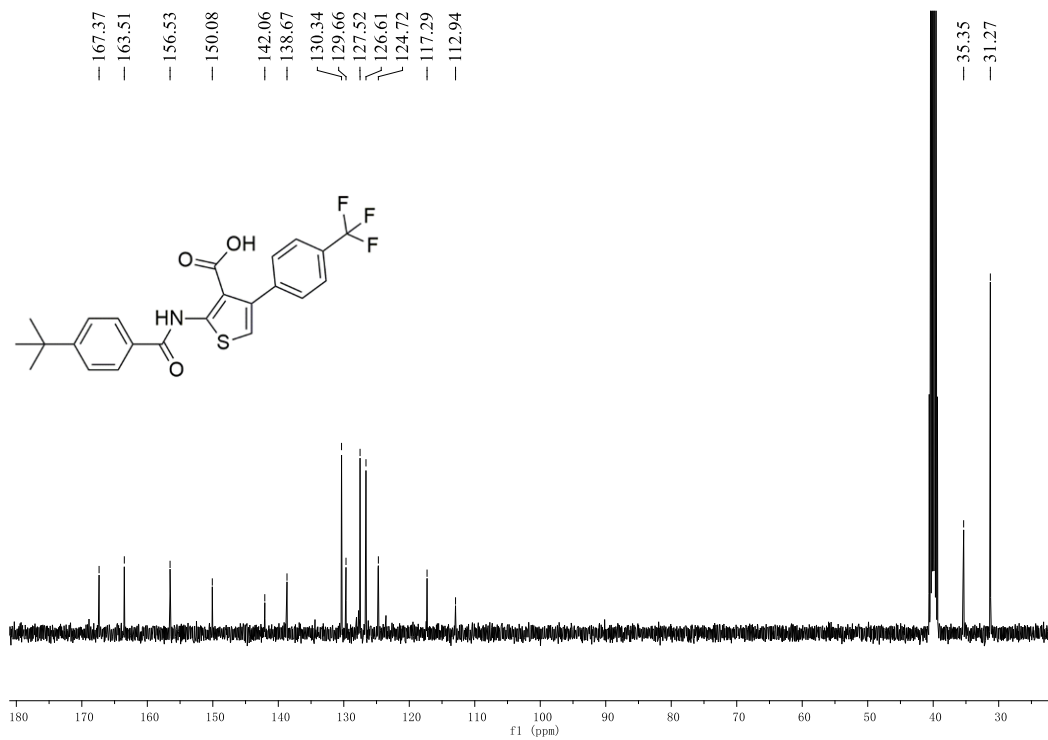

# HRMS

Xevo G2 Q-TOF/YCA166#

252.12(0.233) Cm (10:16-(27+2355))

10-Apr-2017

Waters

1: TOF MS ES-

4.24e4

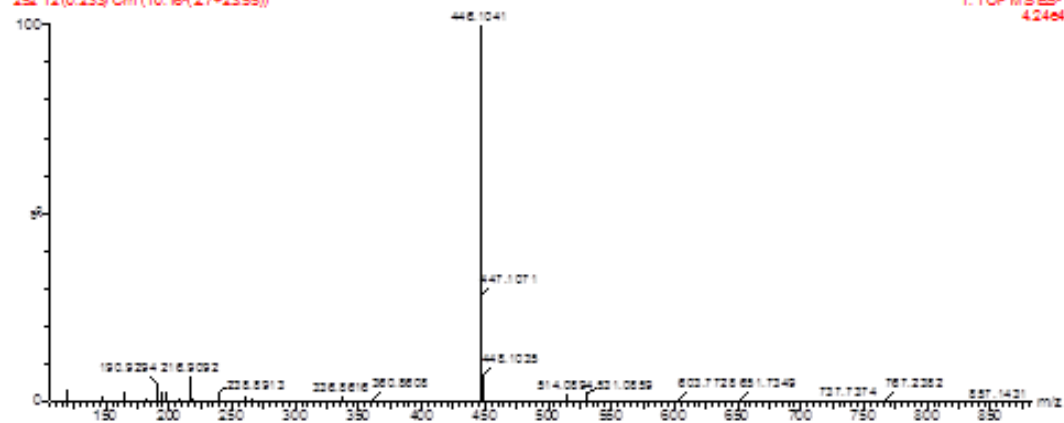

## 2-(4-(*tert*-Butyl) benzamido)-4-(4-(*tert*-butyl) phenyl) thiophene-3-carboxylic acid (**36**)

### <sup>1</sup>H-NMR

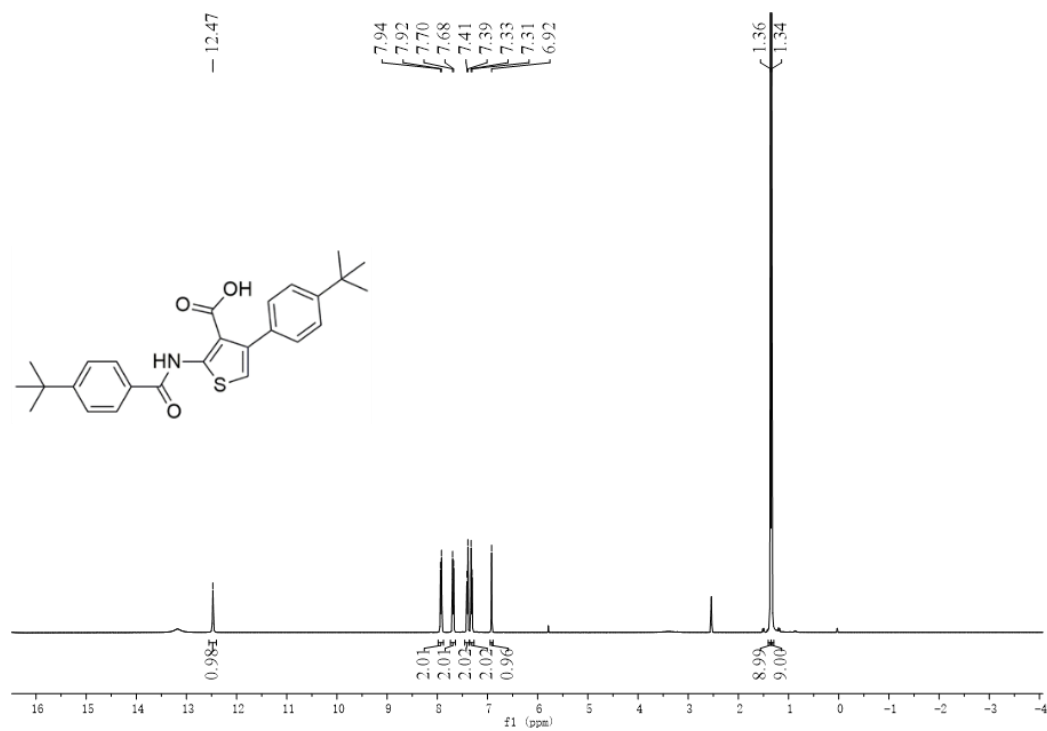



# <sup>13</sup>C-NMR

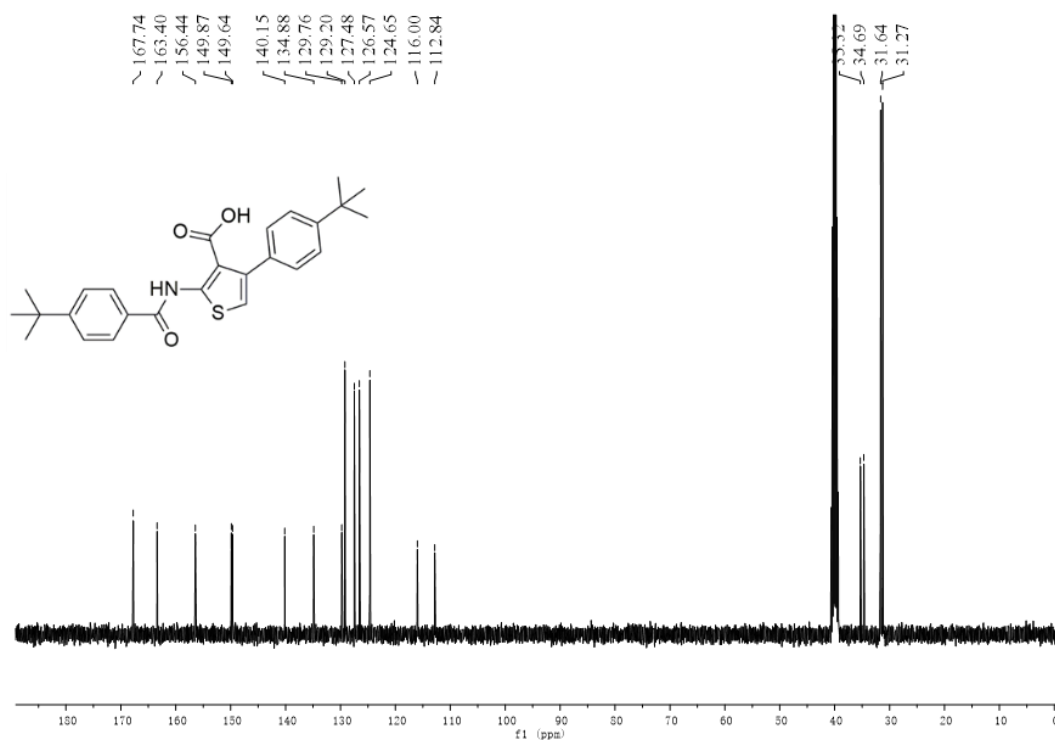

# HRMS

Xevo G2 Q-TOF/YCA 166#

260.12 (0.233) Cm (11:15-(2:7+23:52))

10-Apr-2017

Waters

1: TOF MS ES-

2.92e5

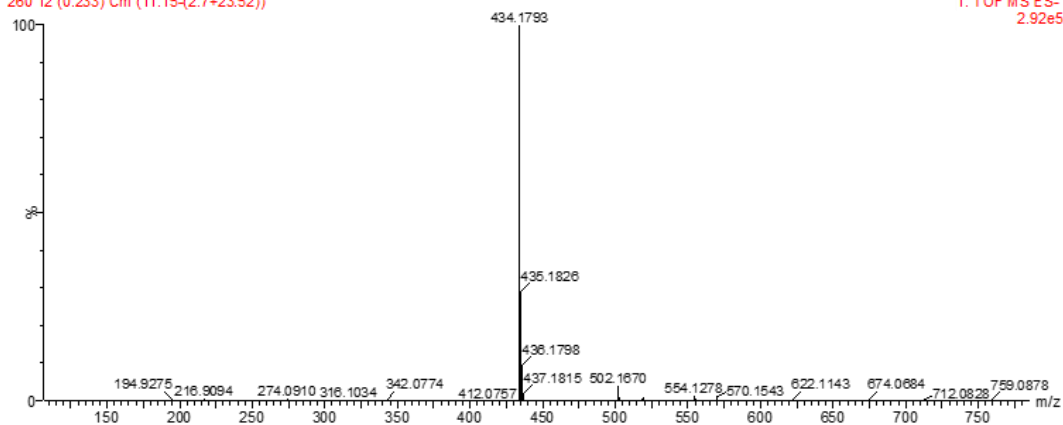

4-([1,1'-Biphenyl]-4-yl)-2-(4-(*tert*-butyl) benzamido) thiophene-3-carboxylic acid (**37**)

<sup>1</sup>H-NMR

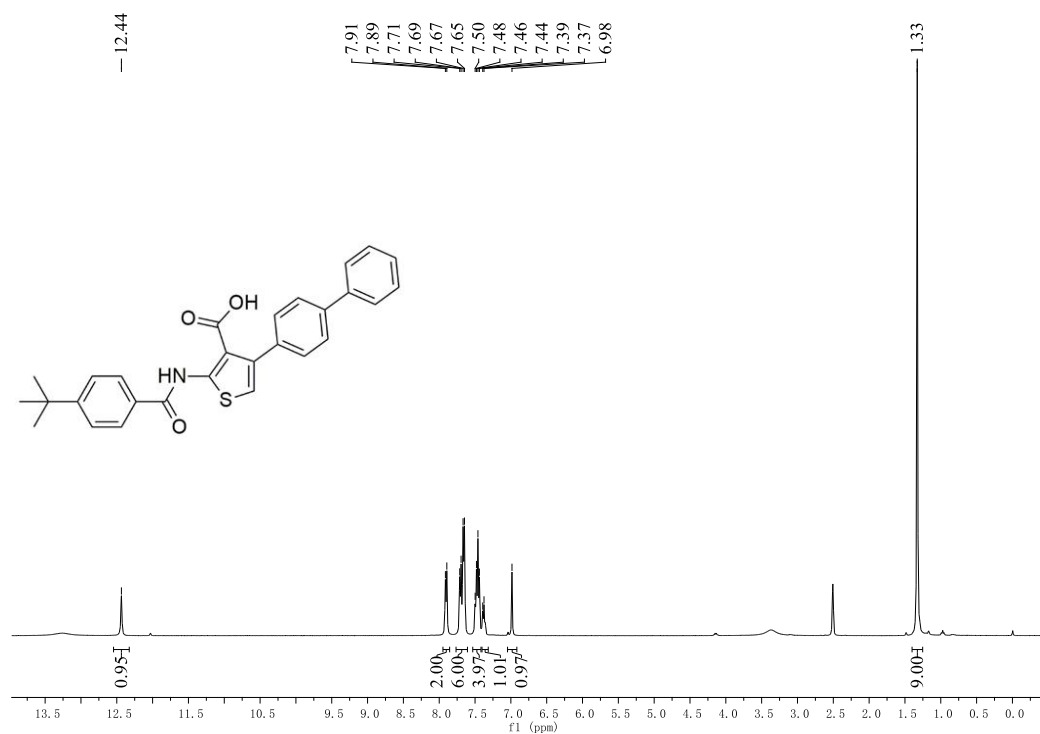

<sup>13</sup>C-NMR

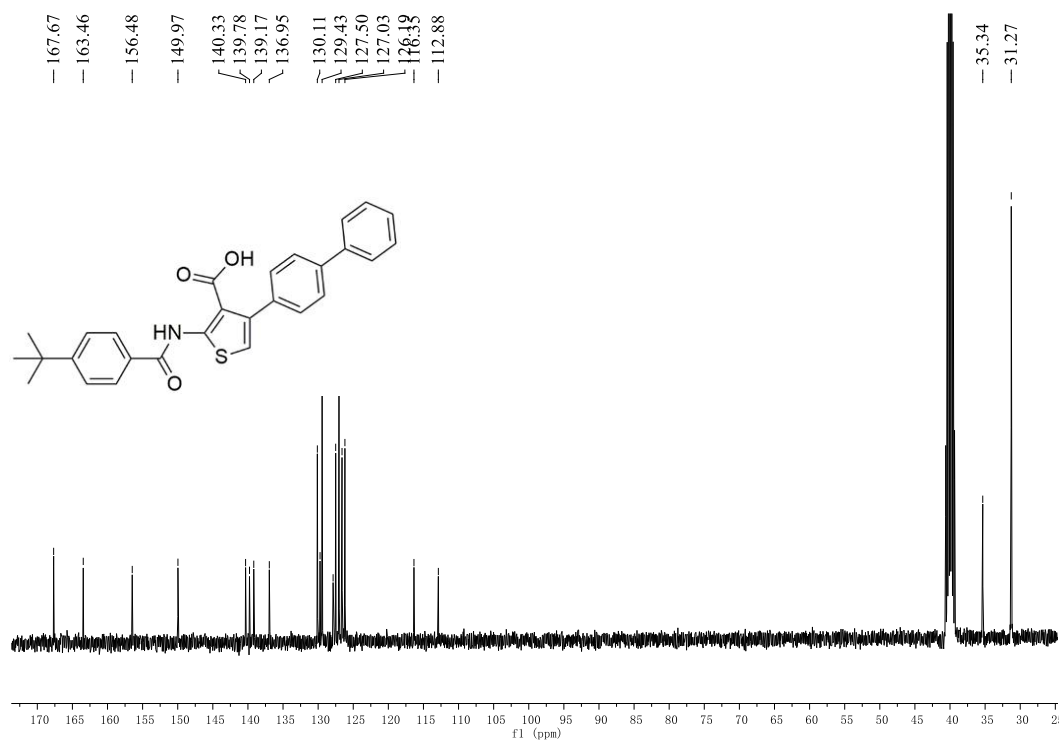

# HRMS

Xevo G2 Q-TOF/YCA166#

268 NEG 10 (0.199) Cm (10:15-(1:7+22:55))

10-Apr-2017

Waters

1: TOF MS ES-

7.12e4

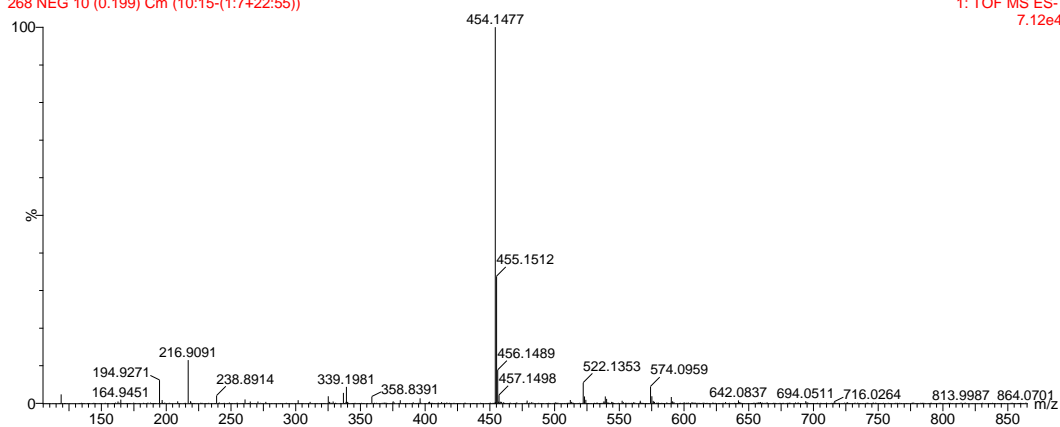

## 2-(4-(*tert*-Butyl) benzamido)-4-(2, 4-dichlorophenyl) thiophene-3-carboxylic acid (**38**)

### <sup>1</sup>H-NMR

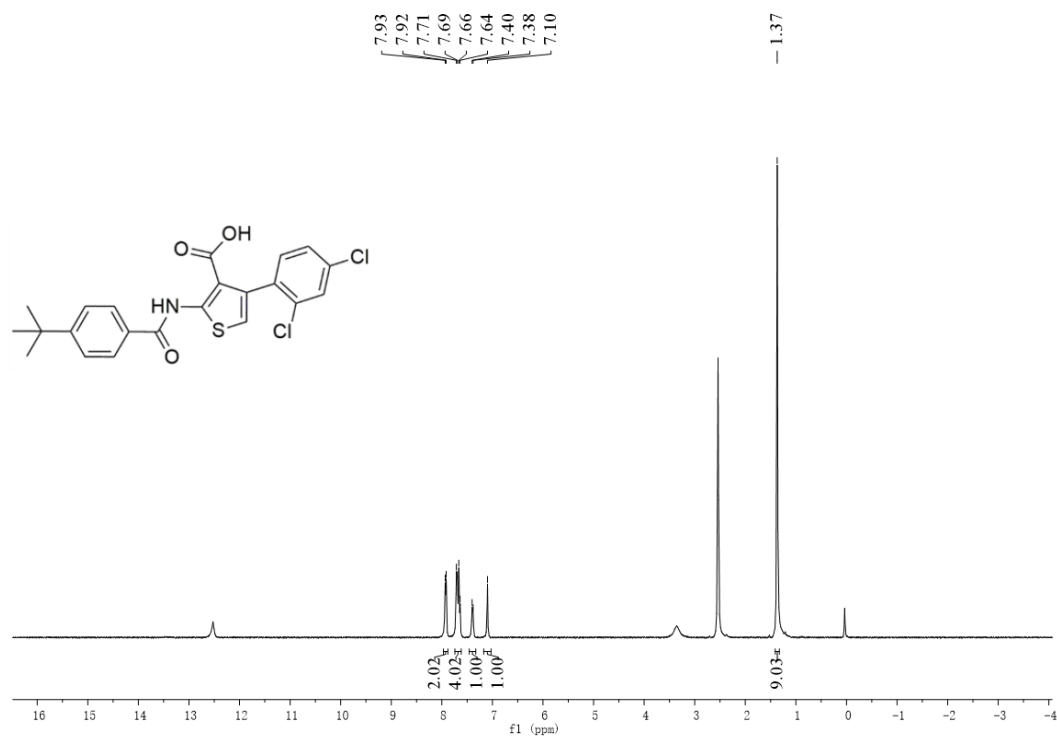

# <sup>13</sup>C-NMR

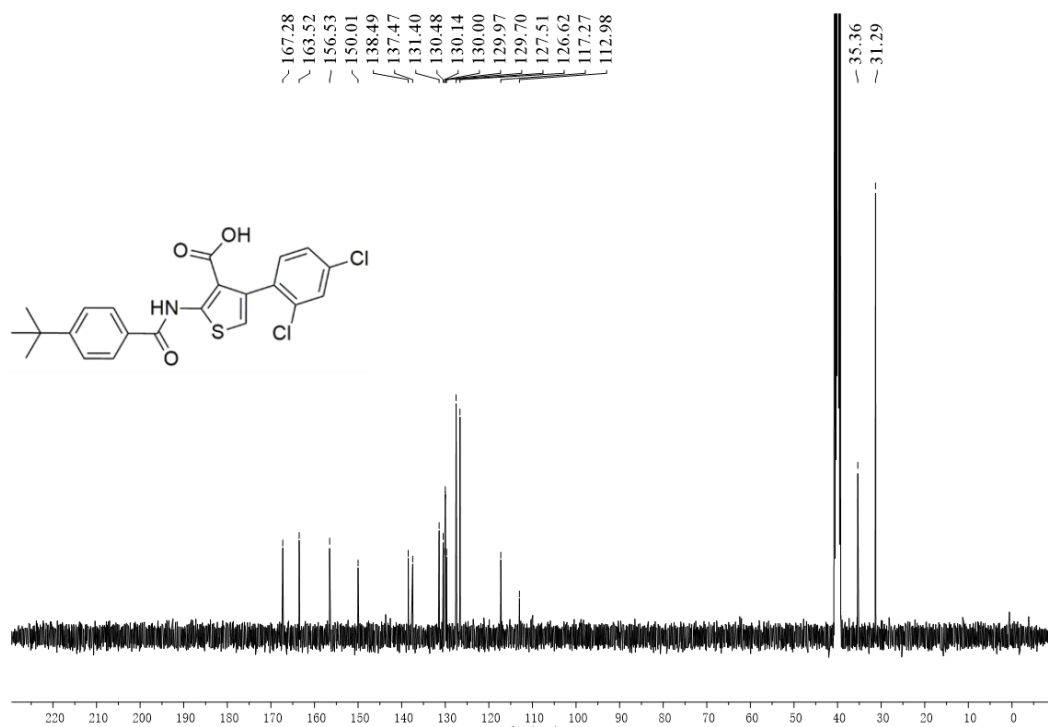

# HRMS

Xevo G2 Q-TOF/CA 166#

270 11 (0.216) Cm (10:15-(1:4+27:54))

10-Apr-2017

Waters

1: TOF MS ES-  
3.73e4

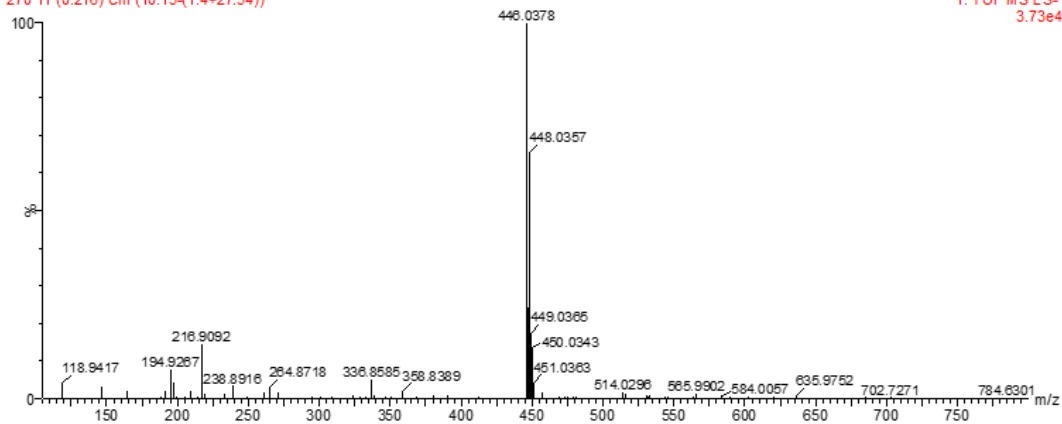

# 2-(4-(*tert*-Butyl) benzamido)-4-(naphthalen-2-yl) thiophene-3-carboxylic acid (**39**)

## <sup>1</sup>H-NMR

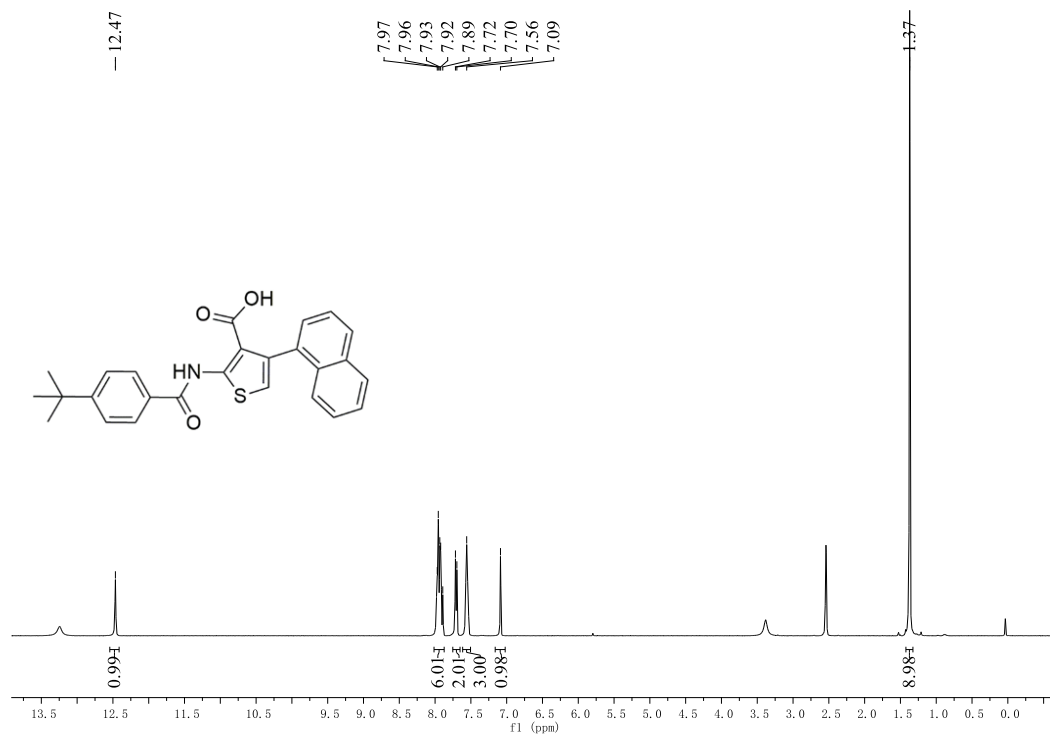

## <sup>13</sup>C-NMR

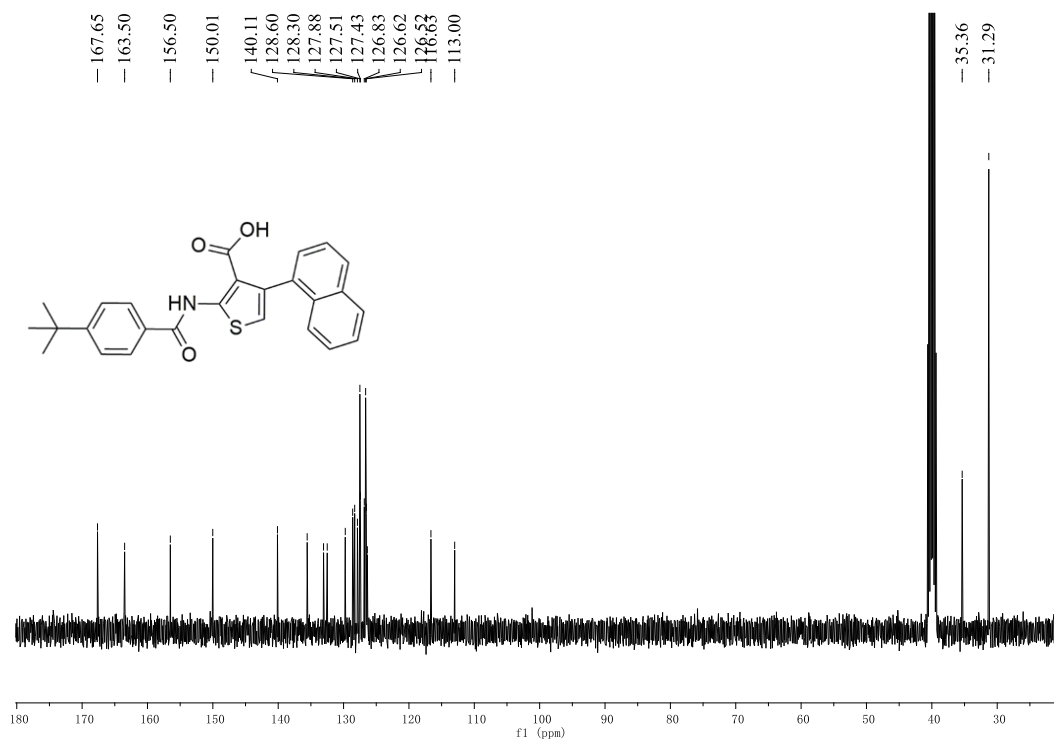

# HRMS

Xevo G2 Q-TOF/YCA166#  
265 10 (0.199) Cm (10:15-(2:4+27:54))

10-Apr-2017

Waters  
1: TOF MS ES-  
1.25e5

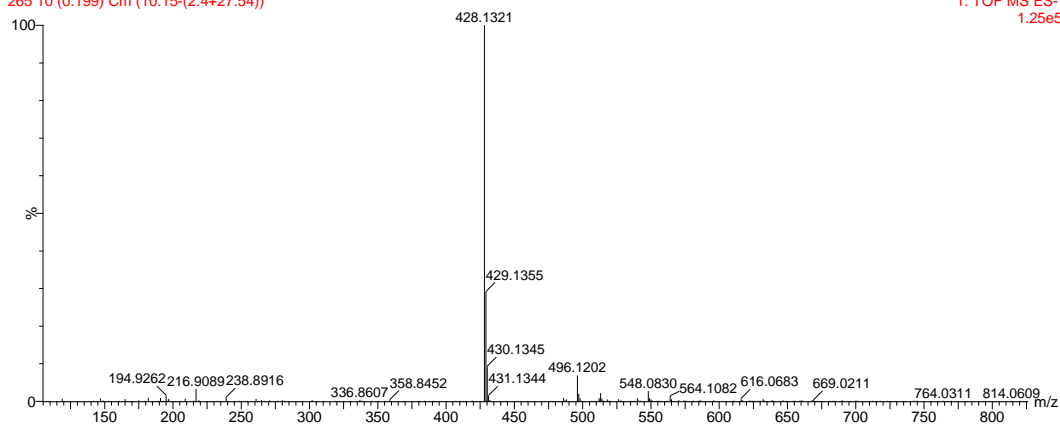

## 4-(4-Methoxyphenyl)-2-(thiophene-2-carboxamido) thiophene-3-carboxylic acid (**40**) <sup>1</sup>H-NMR

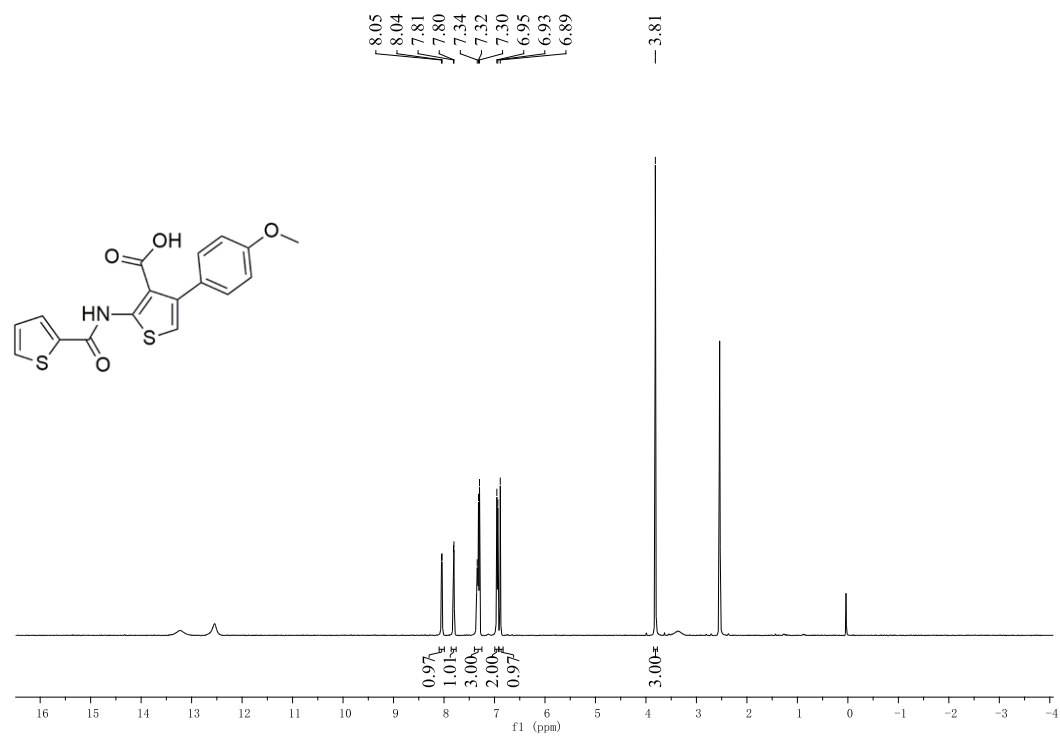

# <sup>13</sup>C-NMR

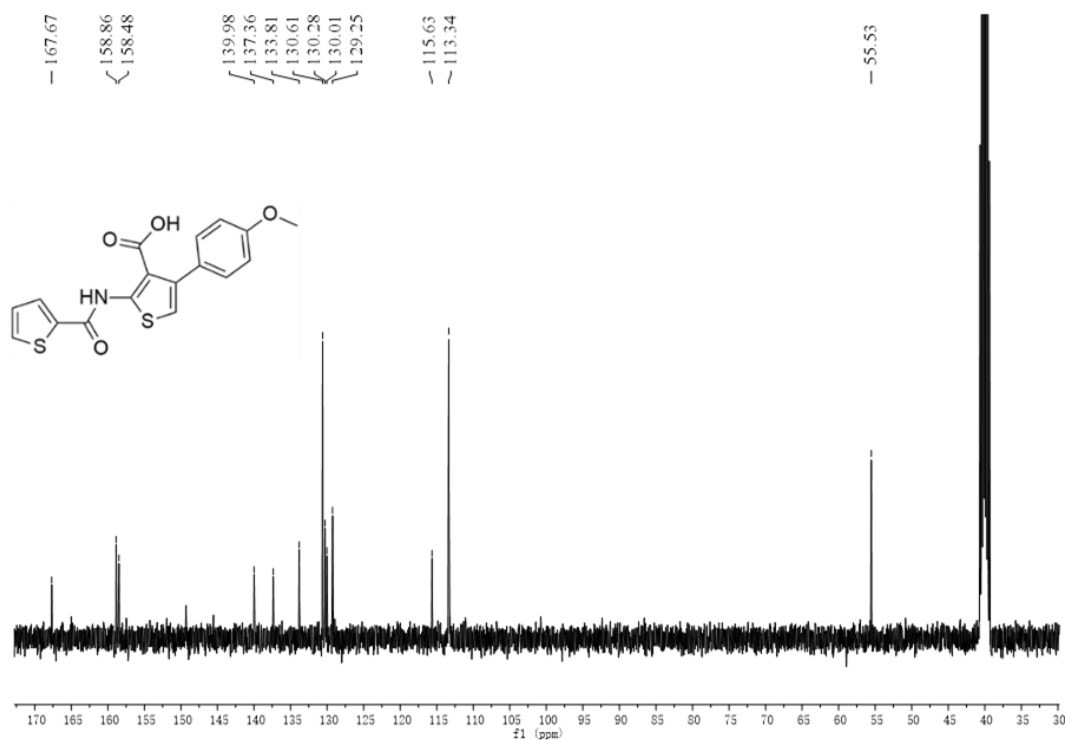

# HRMS

Xevo G2 Q-TOF/YCA 166#

251 15 (0.283) Cm (9:17-(1:5+29:54))

10-Apr-2017

Waters

1: TOF MS ES-  
4.89e4

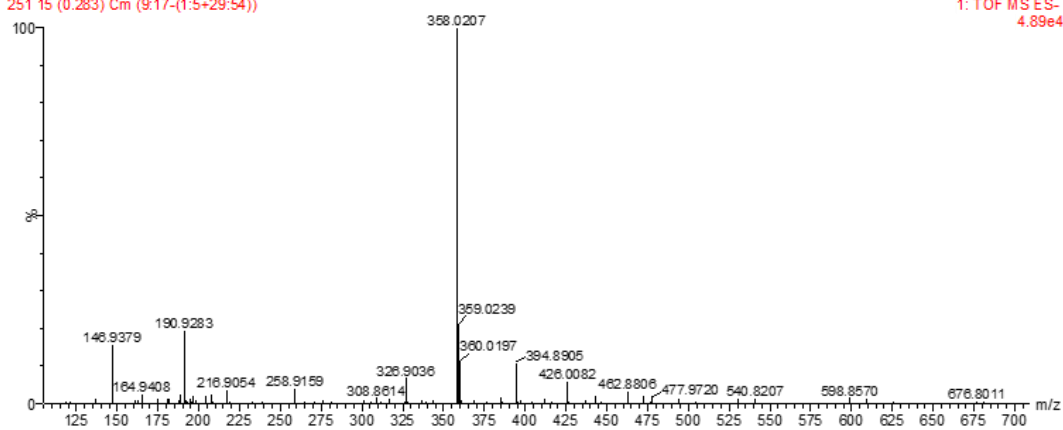

# 4-(4-*tert*-Butyl) phenyl)-2-(4-methoxybenzamido) thiophene-3-carboxylic acid (**41**)

## <sup>1</sup>H-NMR

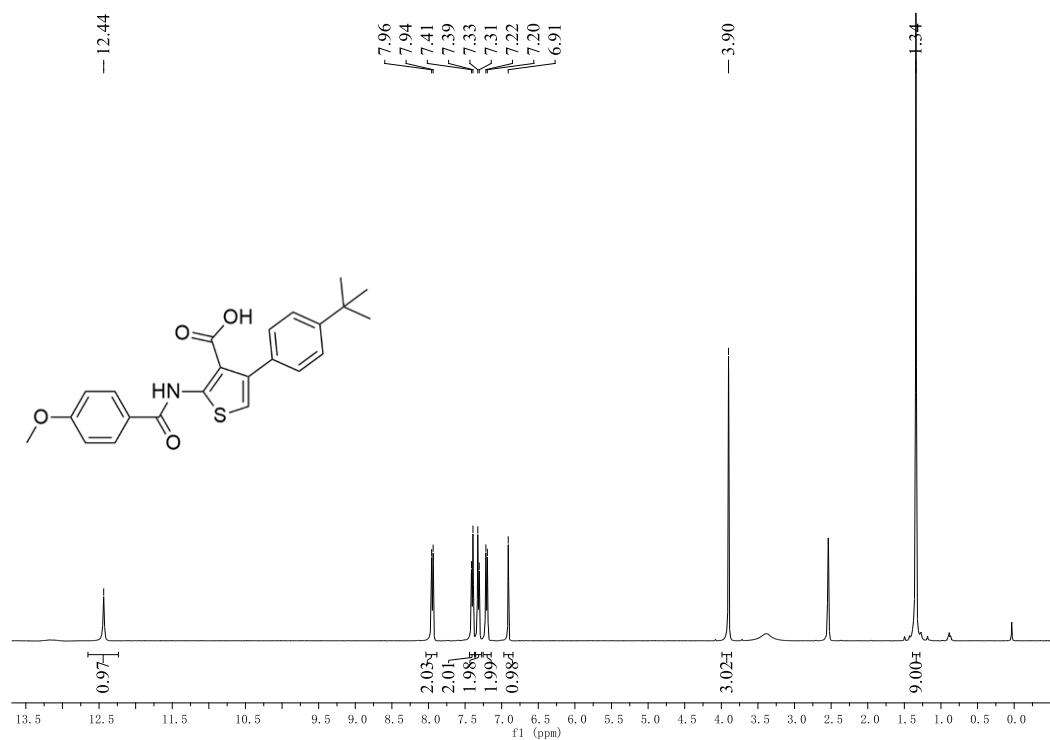

## <sup>13</sup>C-NMR

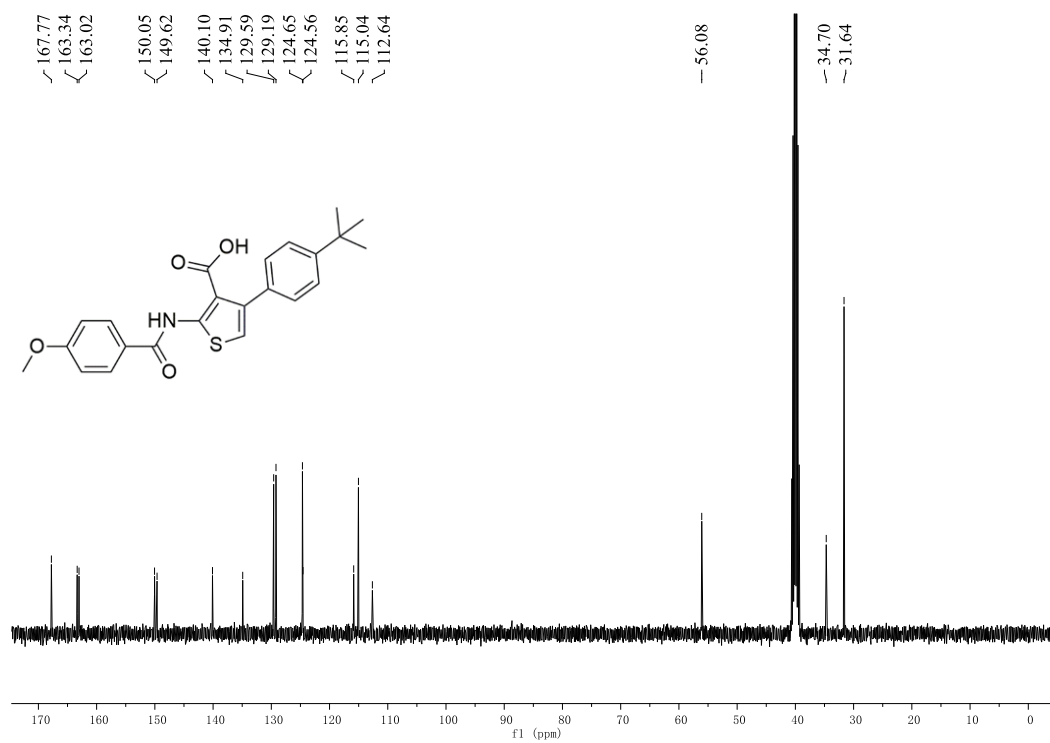



# HRMS

Xevo G2 Q-TOF/YCA166#

261 11 (0.216) Cm (10:15-(2:8+23:53))

10-Apr-2017

Waters

1: TOF MS ES-  
2.78e4

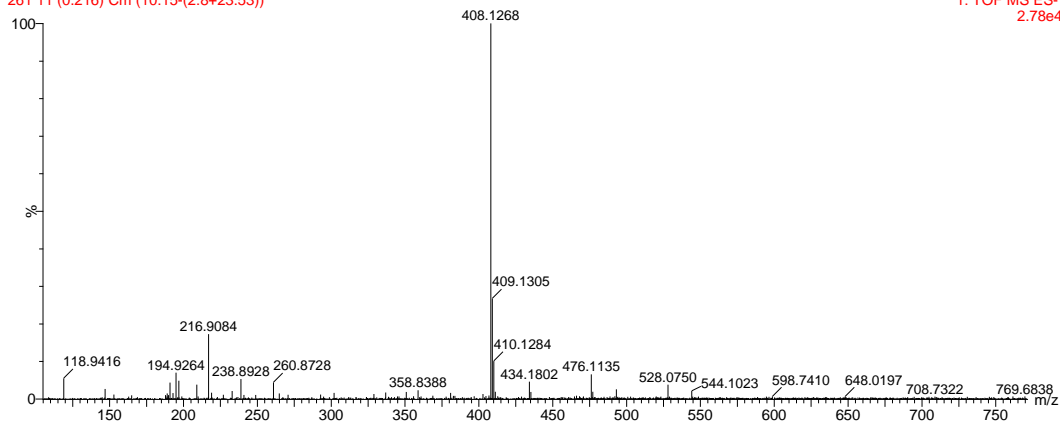

## 2-(1-Naphthamido)-4-(4-chlorophenyl) thiophene-3-carboxylic acid (**42**)

### <sup>1</sup>H-NMR

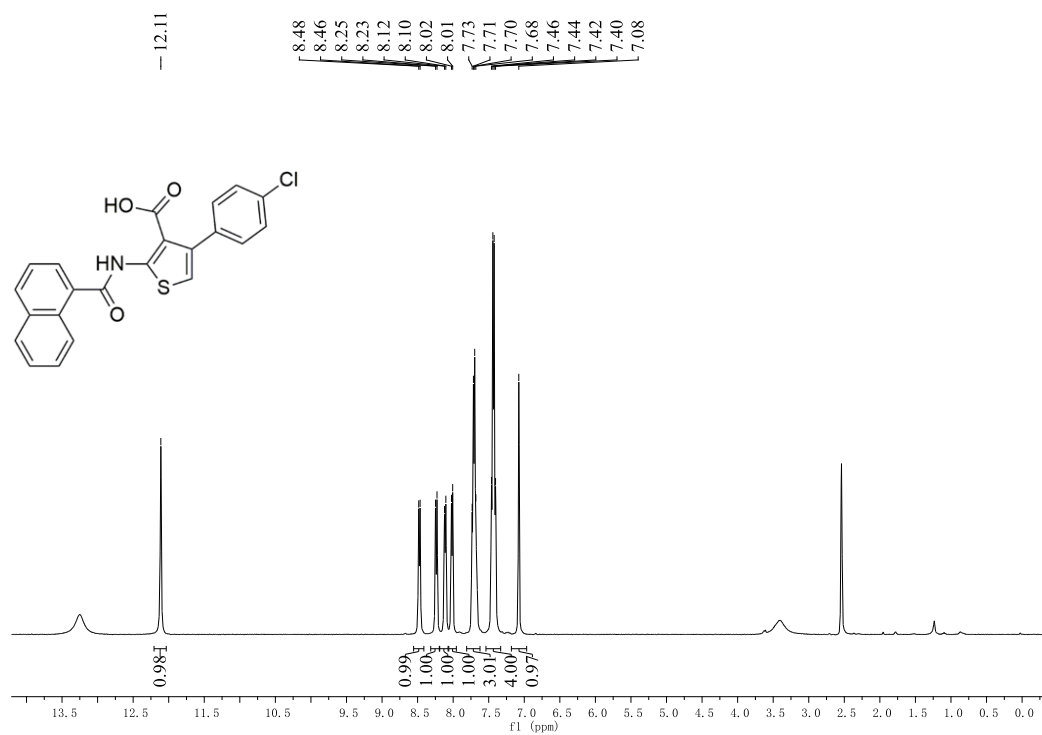

# <sup>13</sup>C-NMR

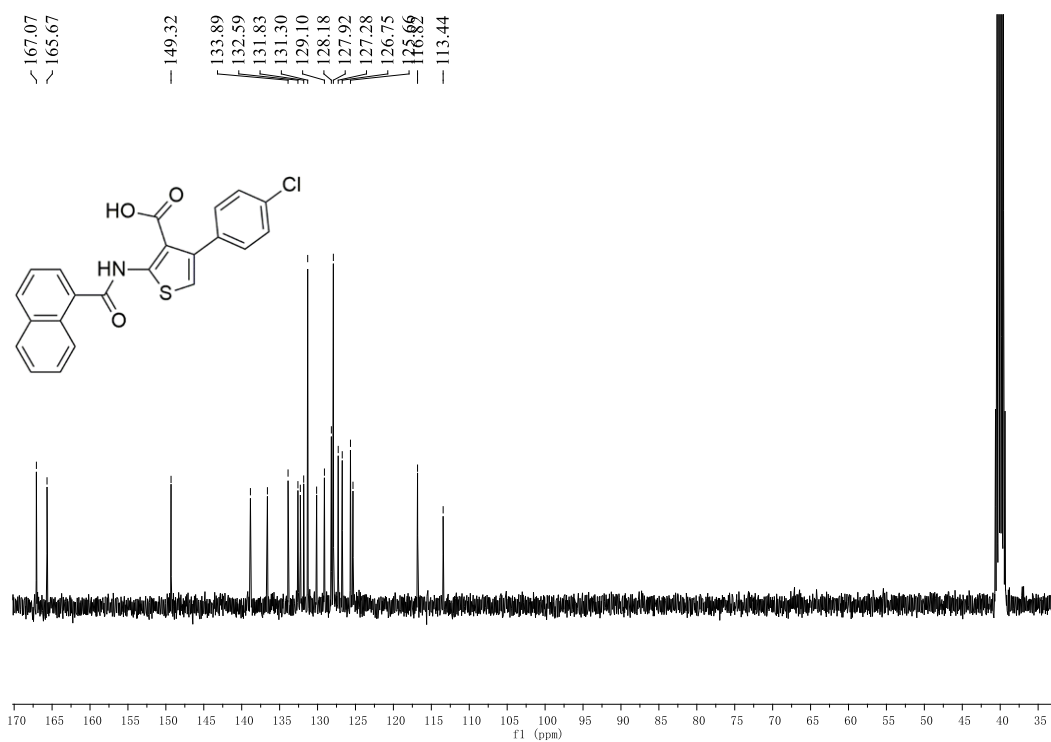

# HRMS

Xevo G2 Q-TOF/YCA166#

285 10 (0.199) Cm (9:15-(2:5+28:51))

10-Apr-2017

Waters

1: TOF MS ES-  
6.46e4

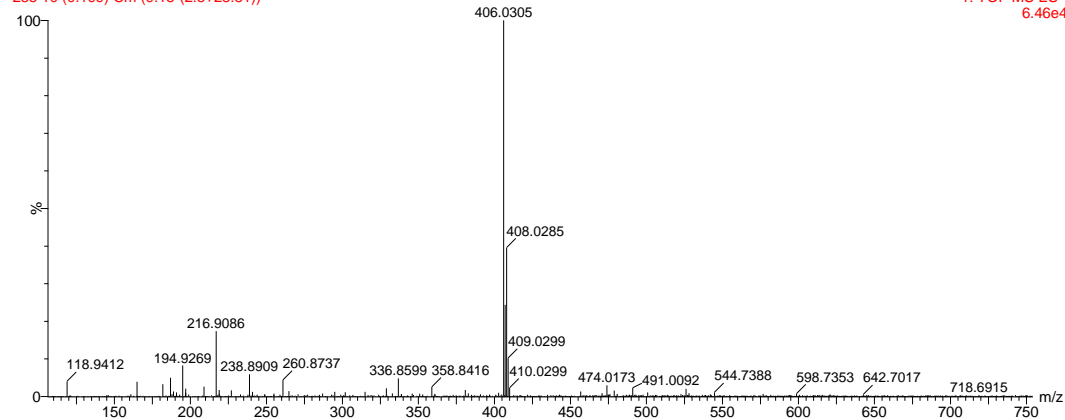

## HPLC

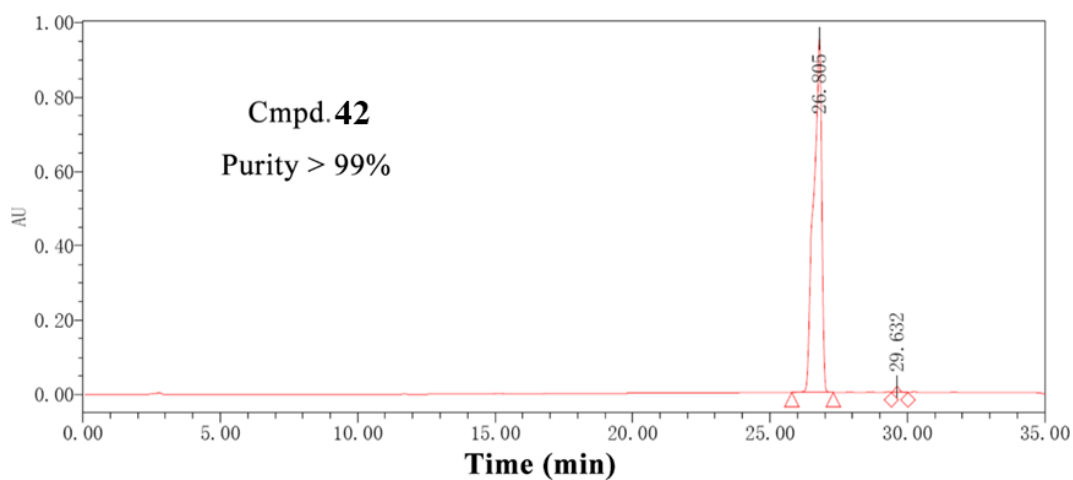

HPLC parameter:

Waters Xbridge C18 column(4.6 mm×250 mm 5 μm i.d.);

Flow rate: 1 mL/min;

Detector: UV 254 nm;

Eluent: A is water containing 0.1% TFA, B is MeOH; 0–5 min: 50% (v/v) A+50% (v/v) B, 25–35 min: 5% (v/v) A+95% (v/v) B.

## 2-(2-Naphthamido)-4-(4-chlorophenyl) thiophene-3-carboxylic acid (**43**)

### <sup>1</sup>H-NMR

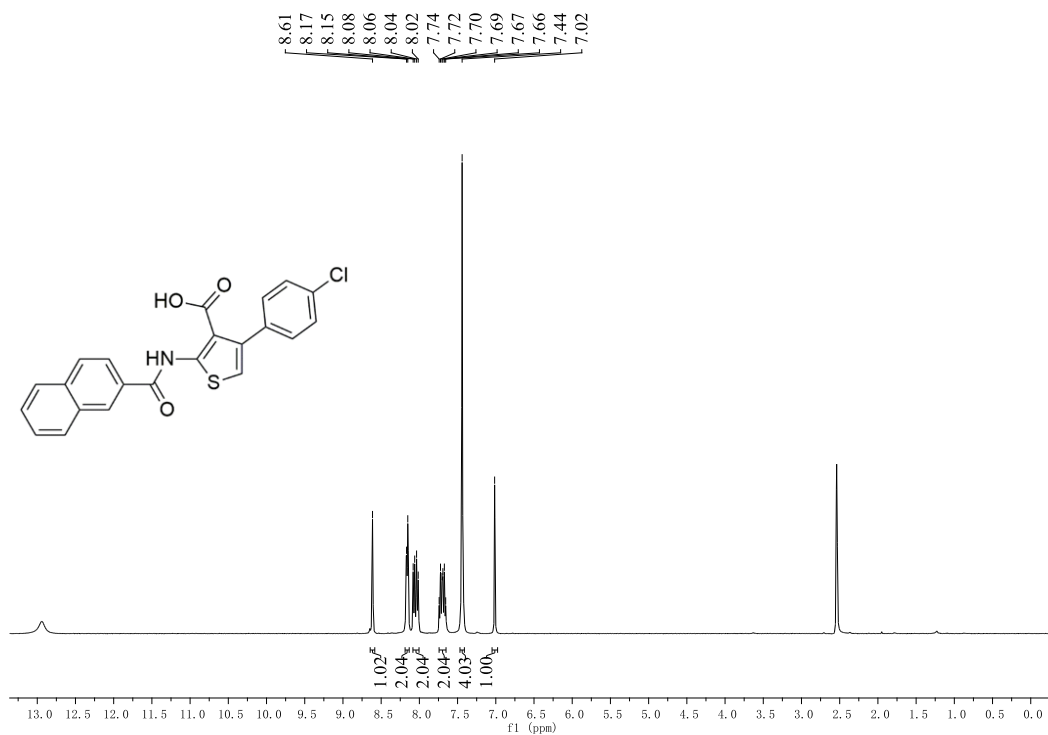

# <sup>13</sup>C-NMR

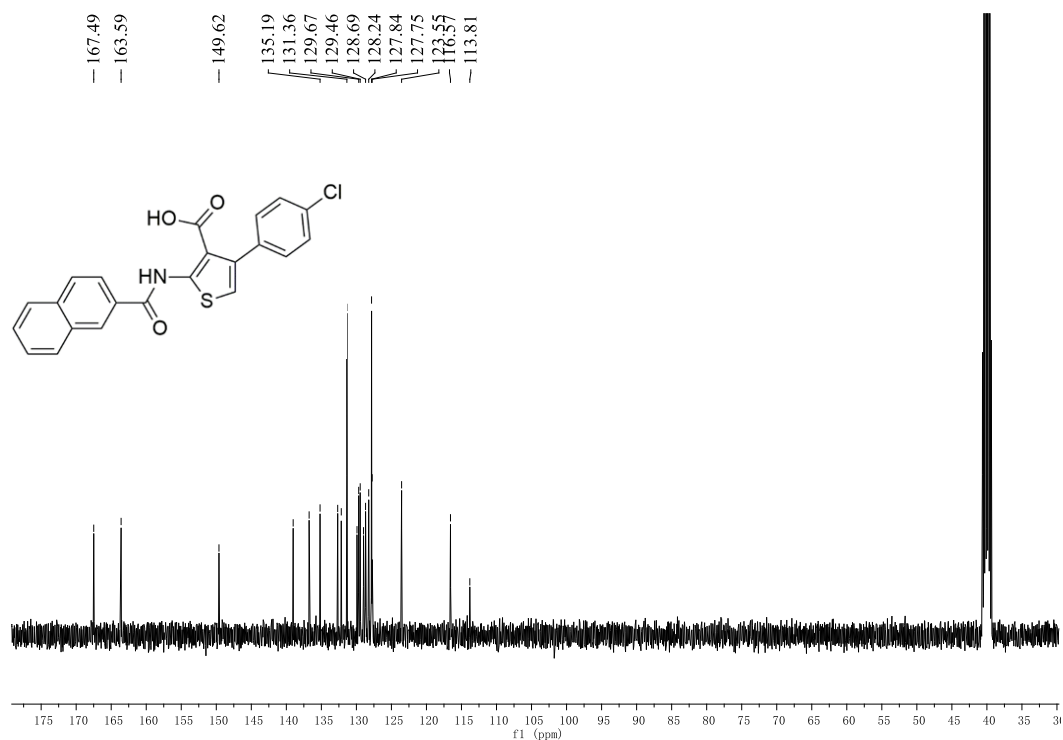

# HRMS

Xevo G2 Q-TOF/YCA166#

10-Apr-2017

Waters

286.11 (0.216) Cm (10:17-(1:8+30:55))

1: TOF MS ES-  
1.22e4

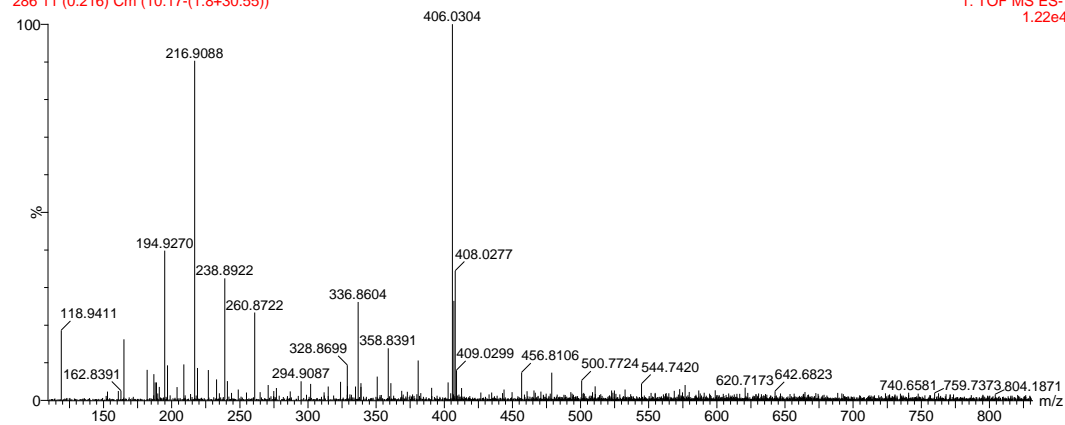

# 4-(4-Chlorophenyl)-2-(2,4-dichlorobenzamido)thiophene-3-carboxylic acid (**44**)

## $^1\text{H-NMR}$

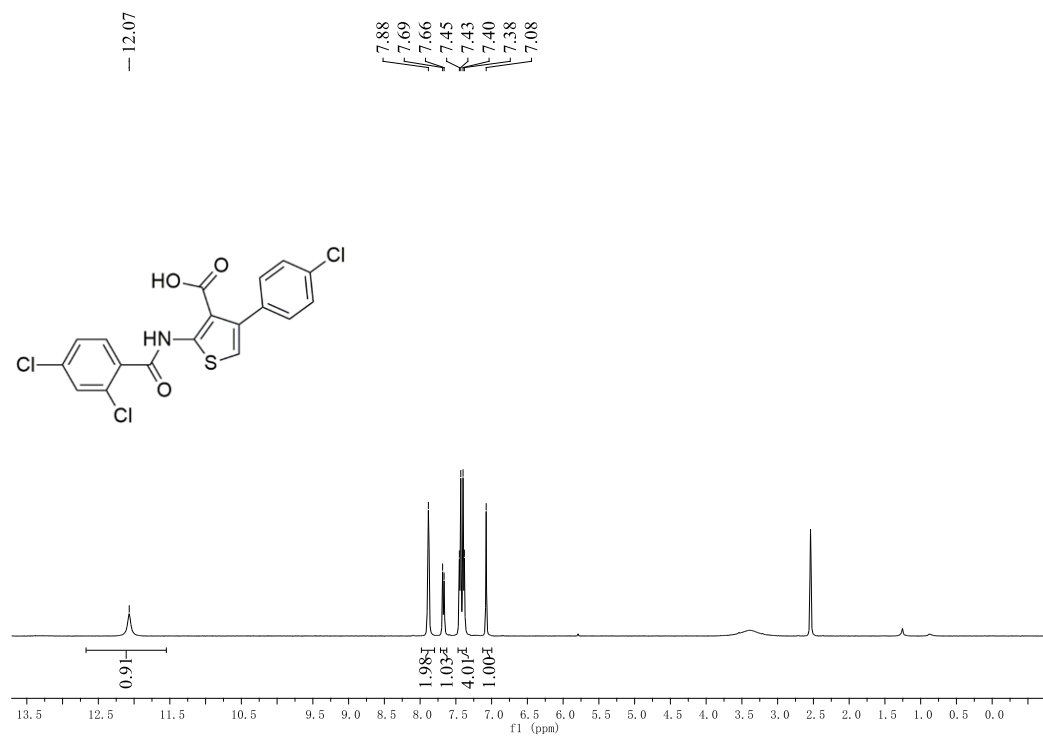

## $^{13}\text{C-NMR}$

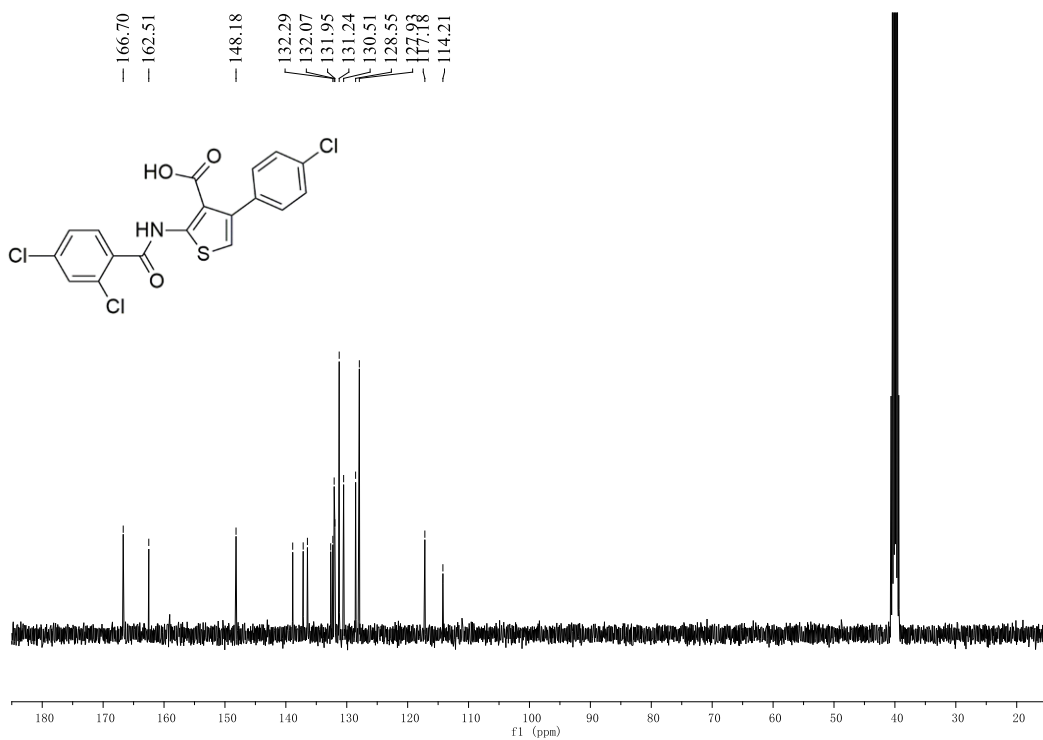

# HRMS

Xevo G2 Q-TOF/YCA166#  
287 12 (0.233) Cm (9:18-(1:3+27:55))

10-Apr-2017

Waters  
1: TOF MS ES-  
1.07e4

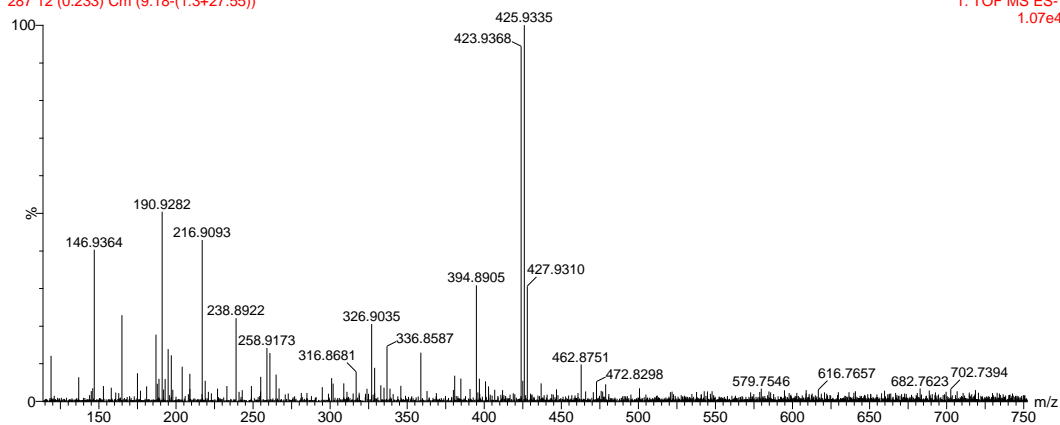

## 4-(4-Chlorophenyl)-2-(thiophene-2-carboxamido) thiophene-3-carboxylic acid (**45**)

### <sup>1</sup>H-NMR

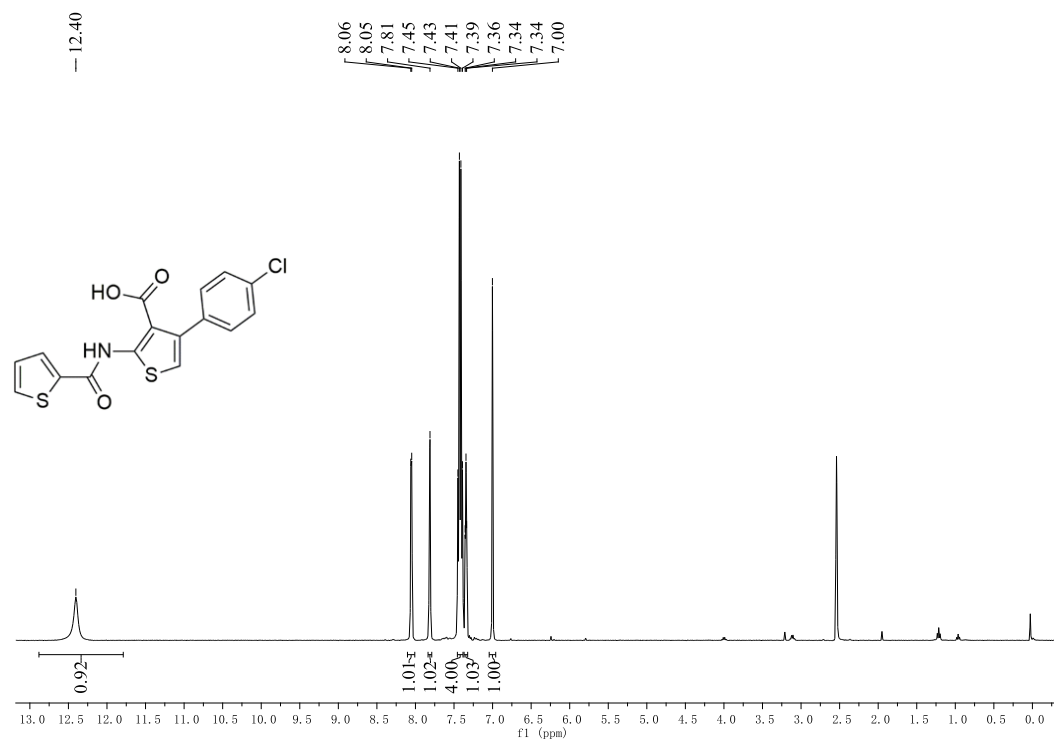

# <sup>13</sup>C-NMR

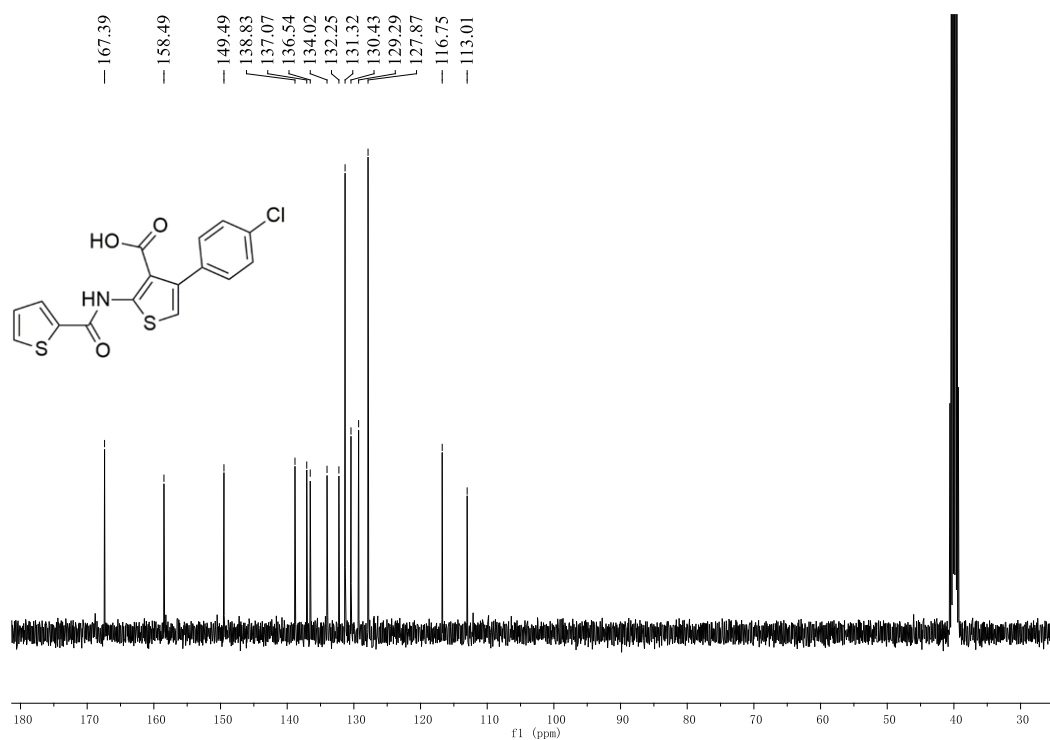

# HRMS

Xevo G2 Q-TOF/YCA166#

288 11 (0.216) Cm (10:14-(1:6+26:53))

10-Apr-2017

Waters

1: TOF MS ES-  
5.34e4

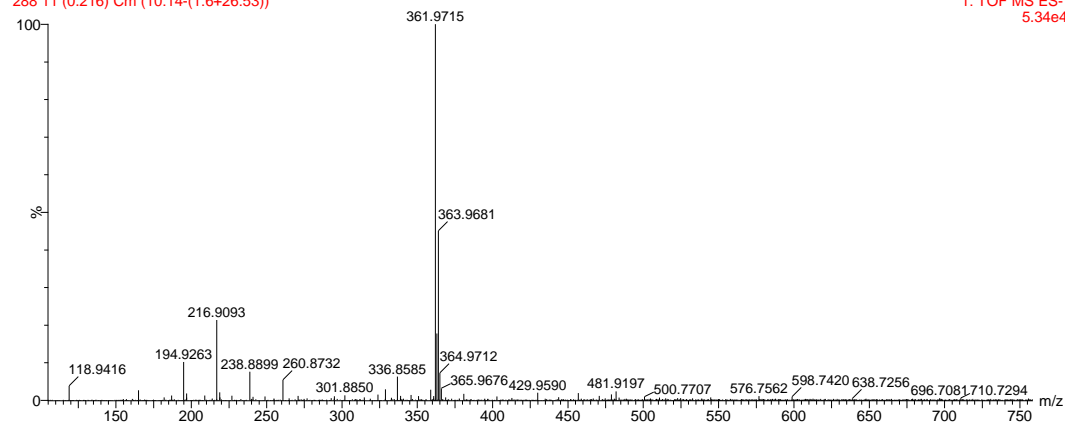

# 4-(4-Chlorophenyl)-2-(4-methyl-1-naphthamido) thiophene-3-carboxylic acid (46)

## $^1\text{H-NMR}$

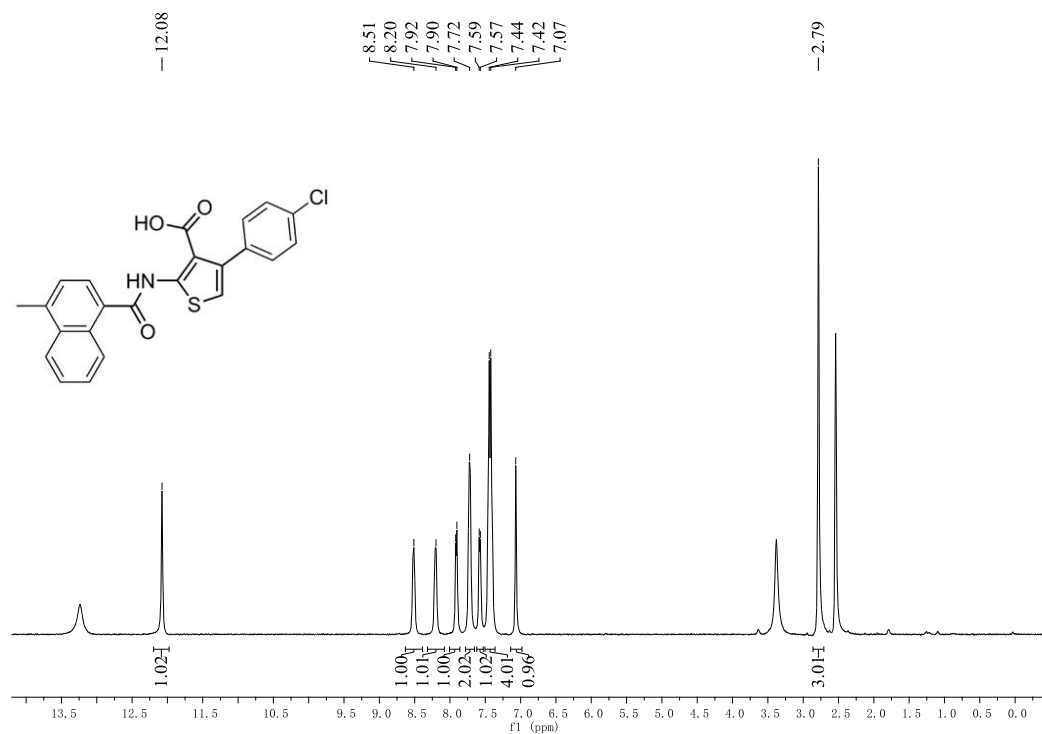

## $^{13}\text{C-NMR}$

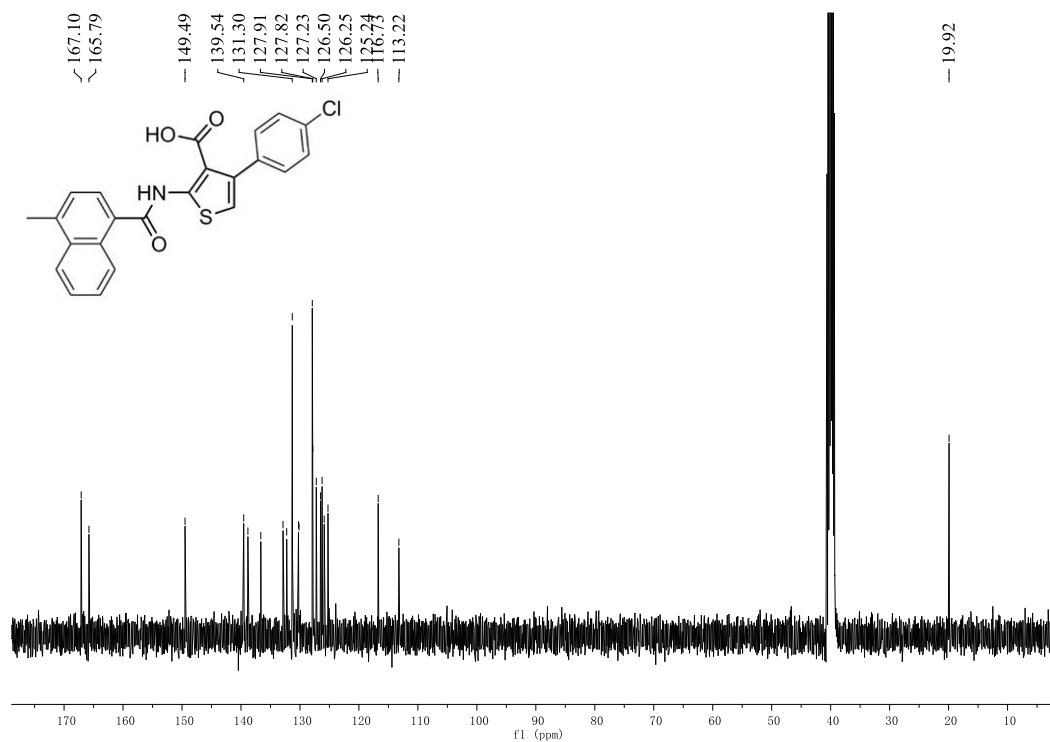



# HRMS

Xevo G2 Q-TOF/YCA166#

293 neg 12 (0.233) Cm (10:15-(2:5+21:54))

10-Apr-2017

Waters

1: TOF MS ES-

1.93e5

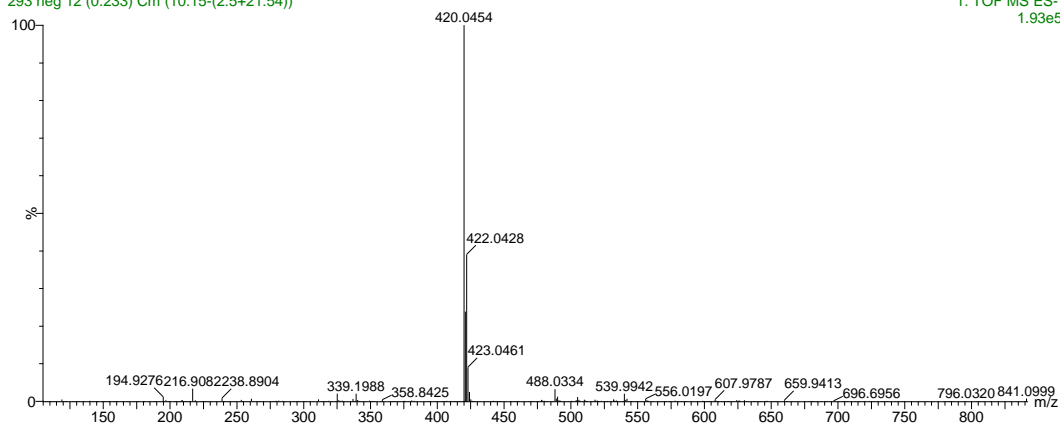

## 2-(4-(*tert*-Butyl) benzamido)-8*H*-indeno [2,1-*b*] thiophene-3-carboxylic acid (**47**)

### <sup>1</sup>H-NMR

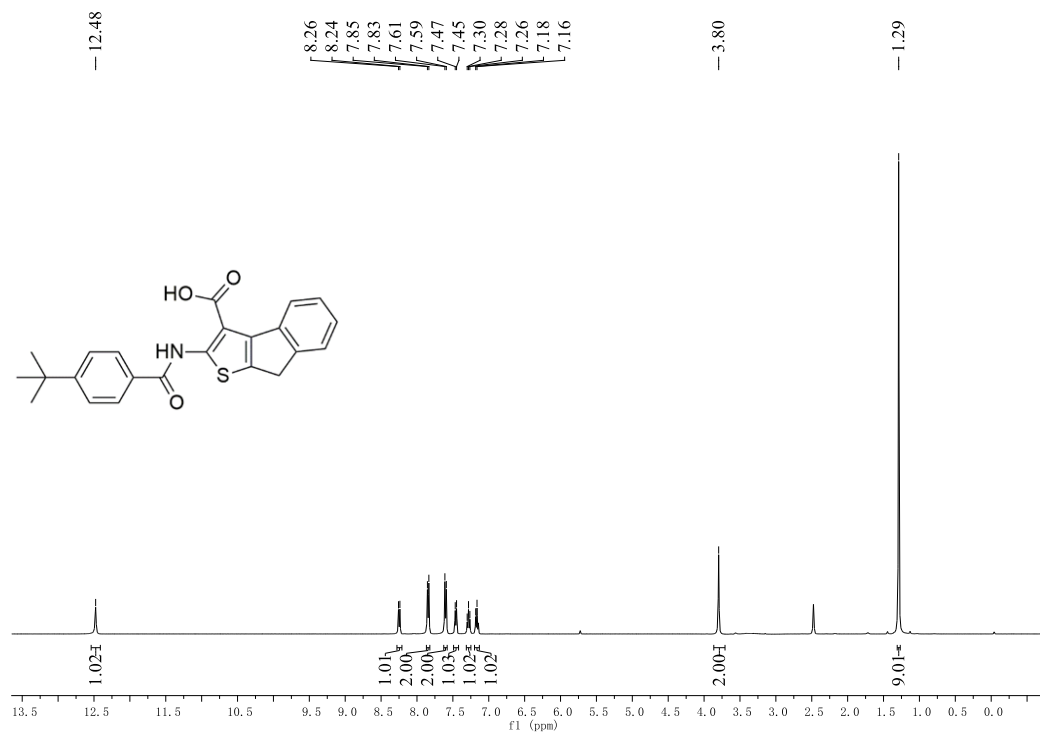

# <sup>13</sup>C-NMR

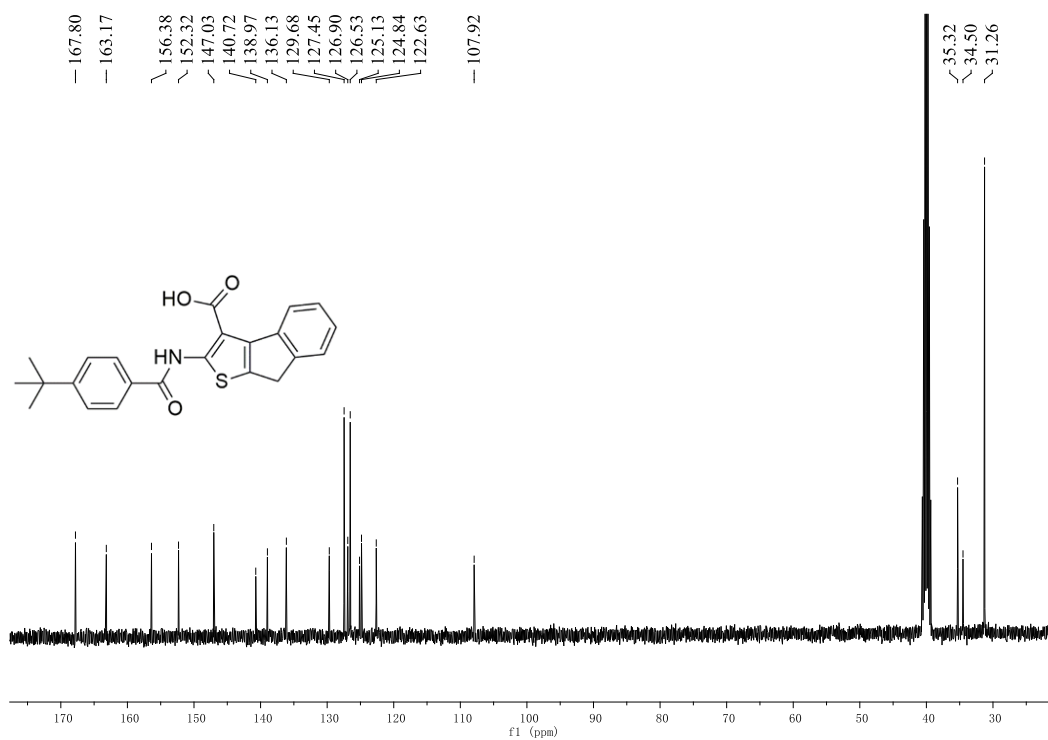

# HRMS

Xevo G2 Q-TOF/YCA166#

269.10 (0.199) Cm (10:16-(2:7+27:49))

10-Apr-2017

Waters

1: TOF MS ES-  
2.13e5

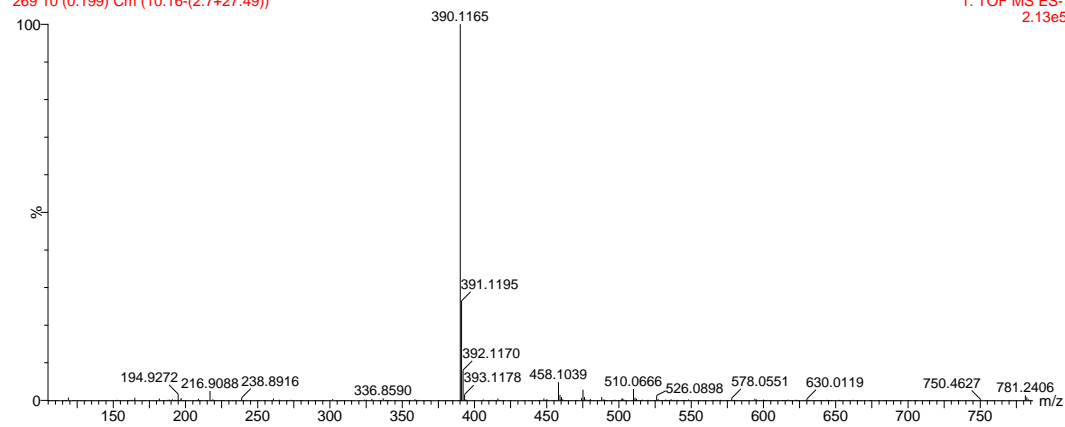

2-(4-(*tert*-Butyl) benzamido)-6-methoxy-8*H*-indeno [2,1-*b*] thiophene-3-carboxylic acid (**48**)

<sup>1</sup>H-NMR

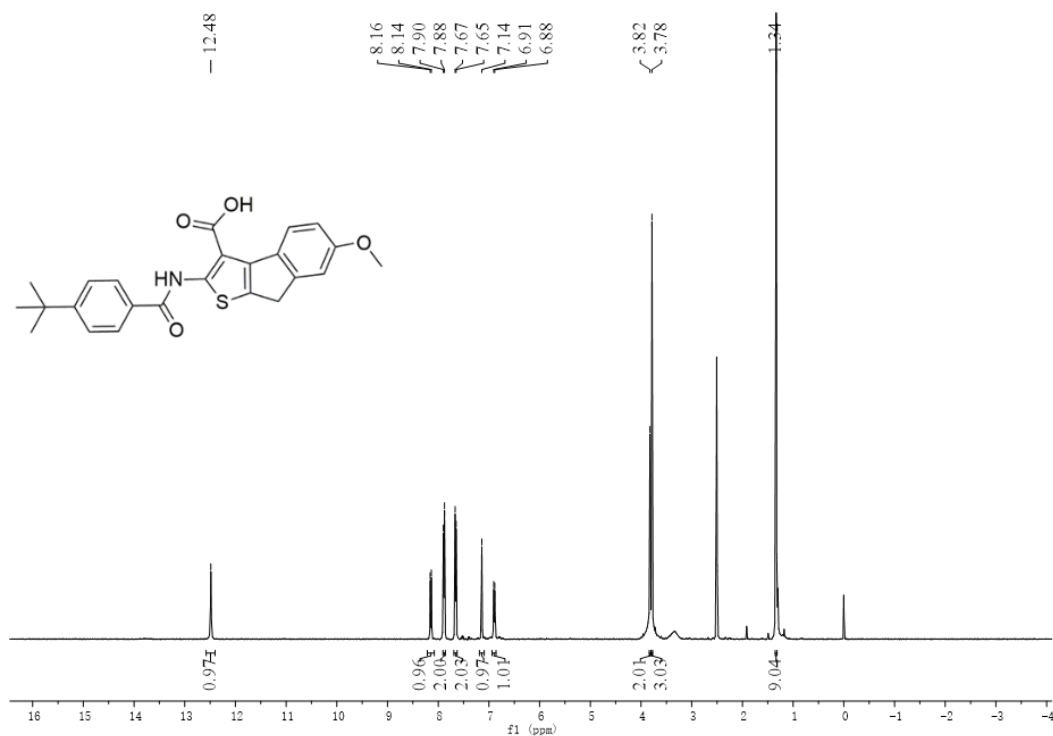

<sup>13</sup>C-NMR

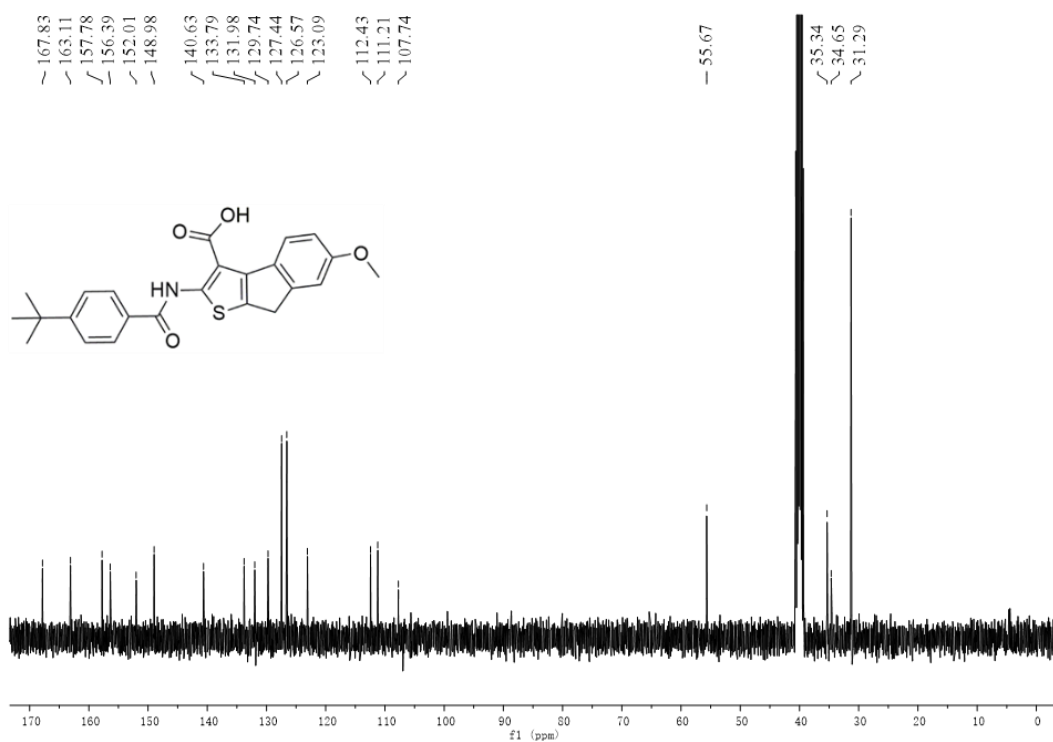

# HRMS

Xevo G2 Q-TOF/YCA166#

279.11 (0.218) Cm (9:16 (24+3149))

10-Apr-2017

Waters  
1: TOF MS ES-  
362e4

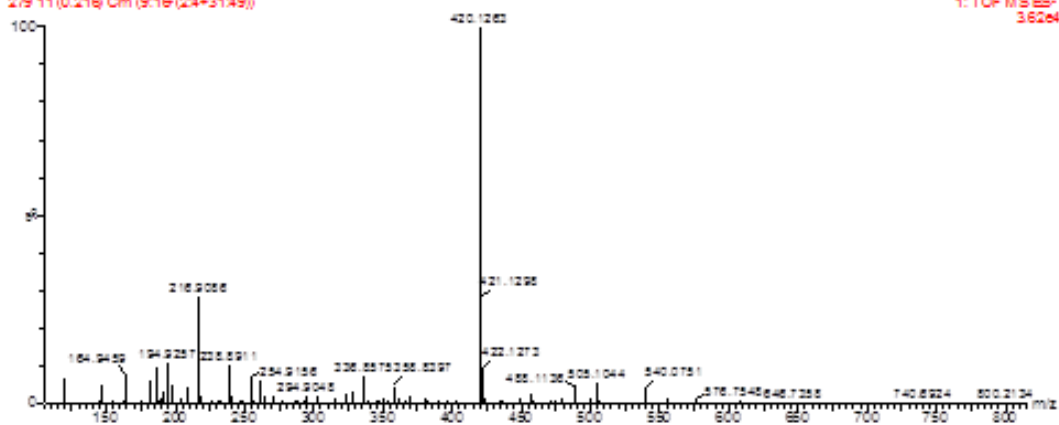

## 2-(Thiophene-2-carboxamido)-8*H*-indeno [2,1-*b*] thiophene-3-carboxylic acid (**49**)

### <sup>1</sup>H-NMR

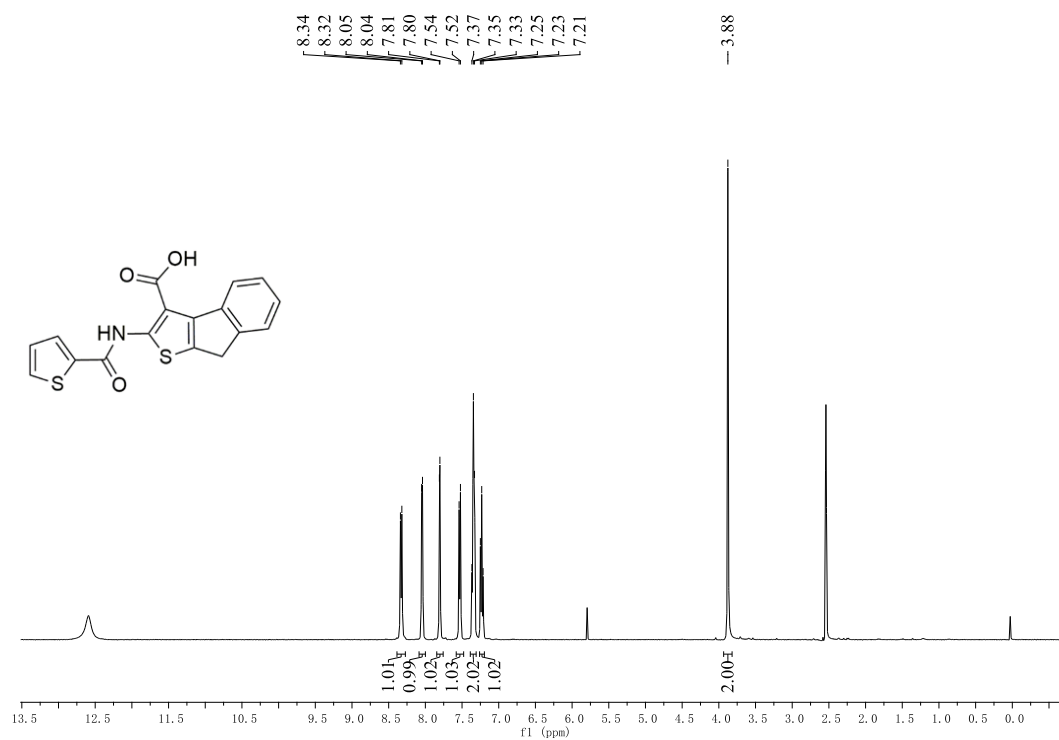

# <sup>13</sup>C-NMR

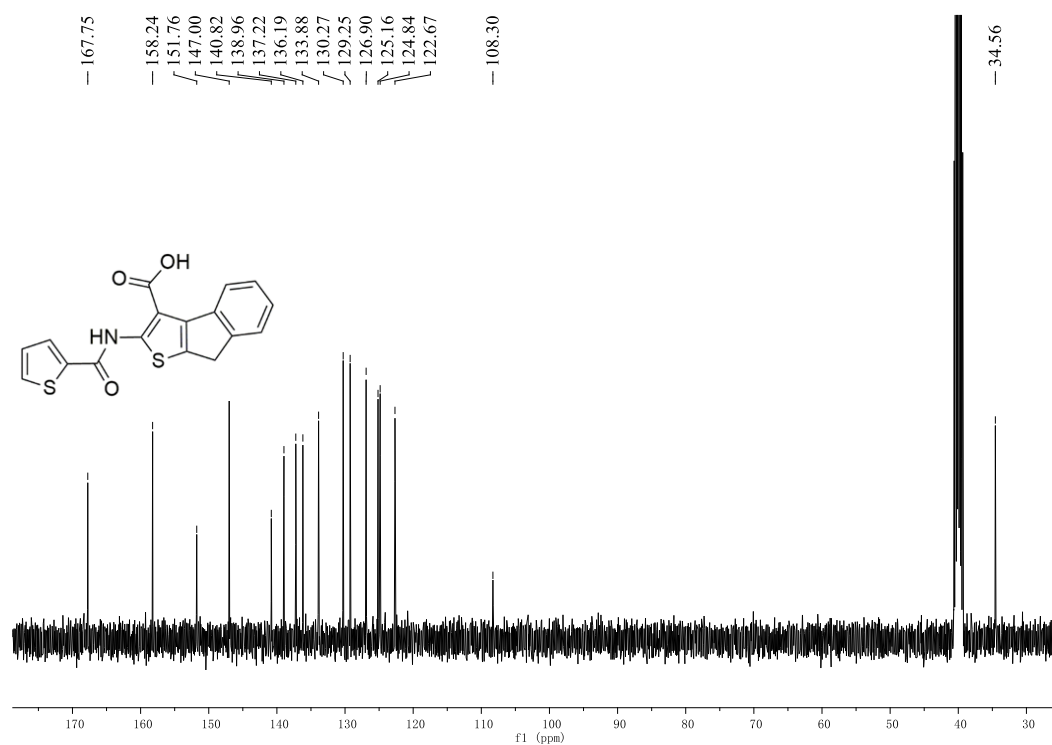

# HRMS

Xevo G2 Q-TOF/YCA166#

280 10 (0.199) Cm (10:16-(1:4+33:53))

10-Apr-2017

Waters

1: TOF MS ES-  
3.15e5

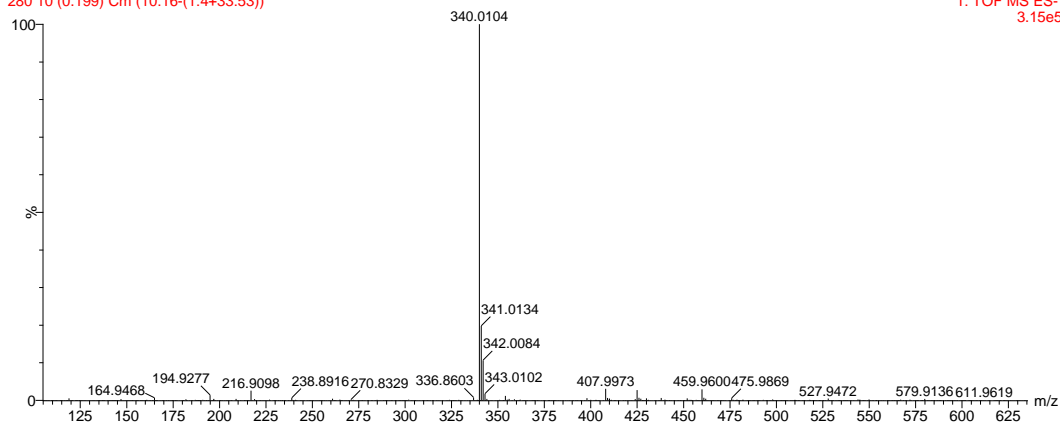

# 2-(2-Naphthamido)-8*H*-indeno [2,1-*b*] thiophene-3-carboxylic acid (**50**)

## <sup>1</sup>H-NMR

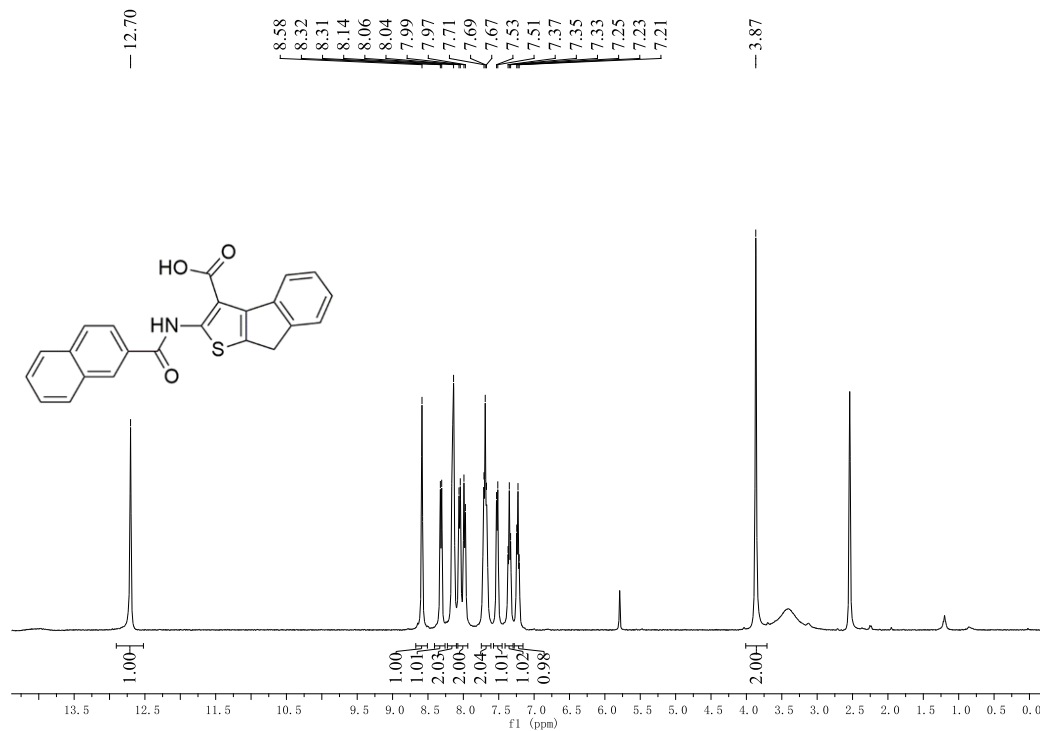

## <sup>13</sup>C-NMR

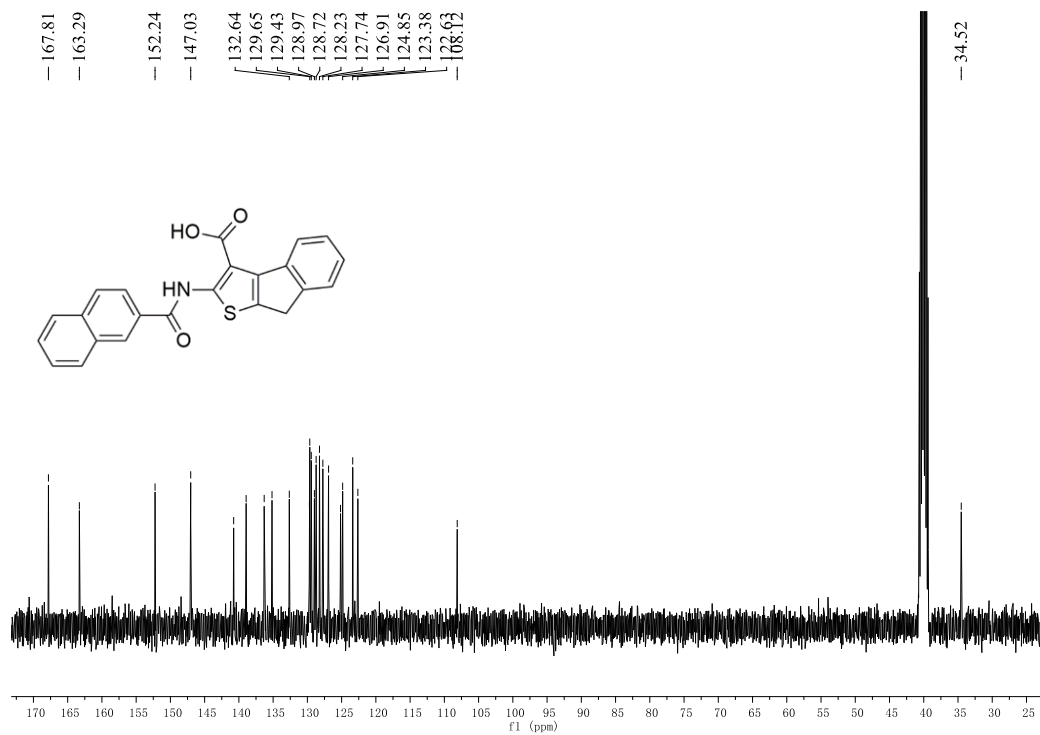

# HRMS

Xevo G2 Q-TOF/YCA166#  
290 neg 12 (0.233) Cm (10:16-(2:6+22:28))

10-Apr-2017

Waters  
1: TOF MS ES-  
4.82e5

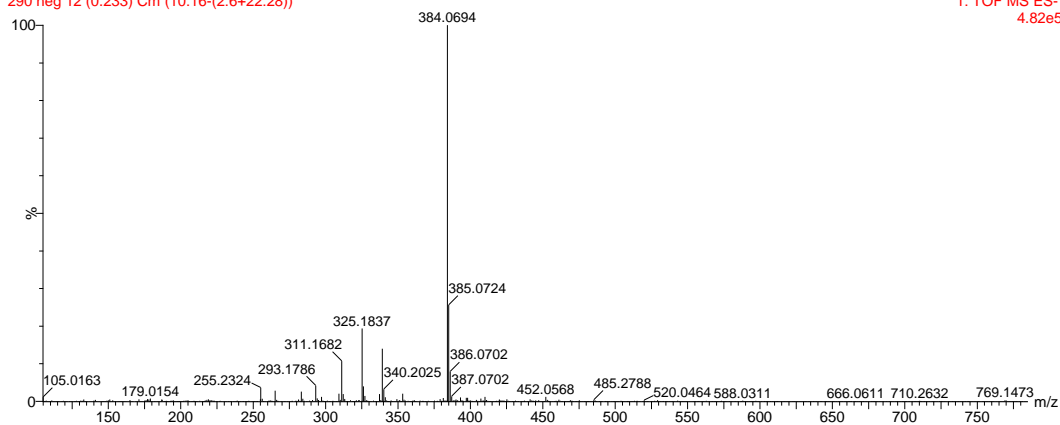

## 2-(1-Naphthamido)-8*H*-indeno [2,1-*b*] thiophene-3-carboxylic acid (**51**)

### <sup>1</sup>H-NMR

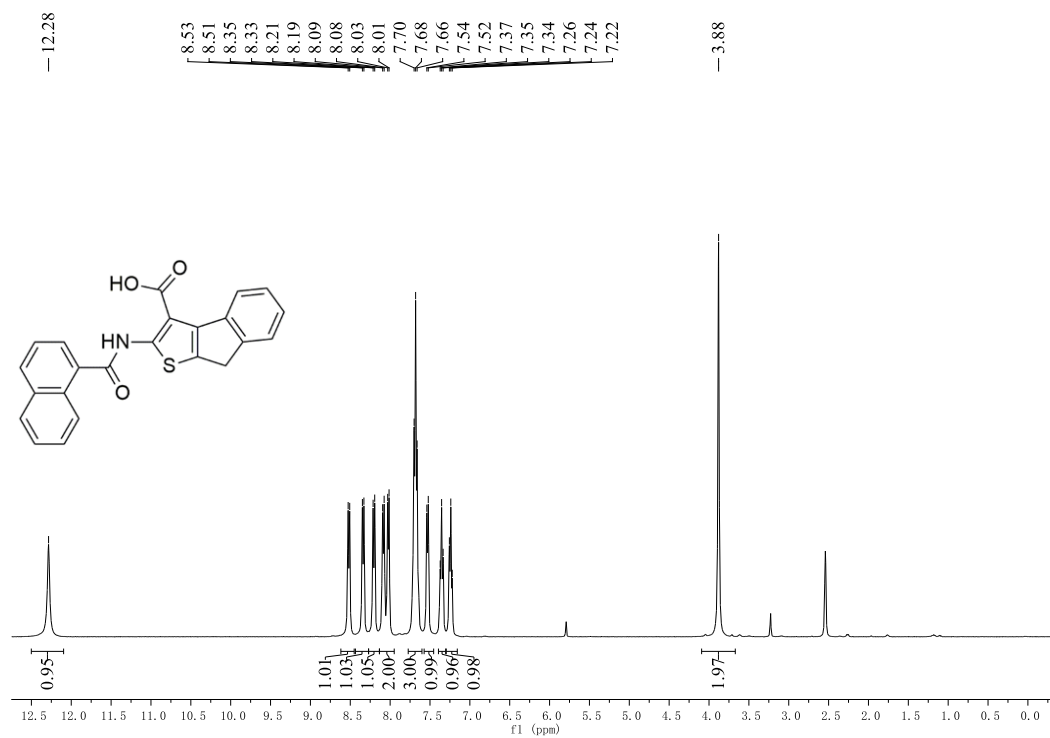

# <sup>13</sup>C-NMR

~ 167.47  
~ 163.31  
- 151.68  
- 147.06  
136.27  
133.91  
129.06  
128.12  
127.22  
126.91  
126.74  
125.60  
125.41  
125.16  
124.85  
122.99

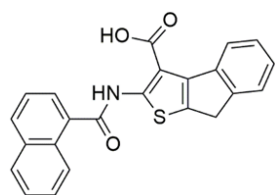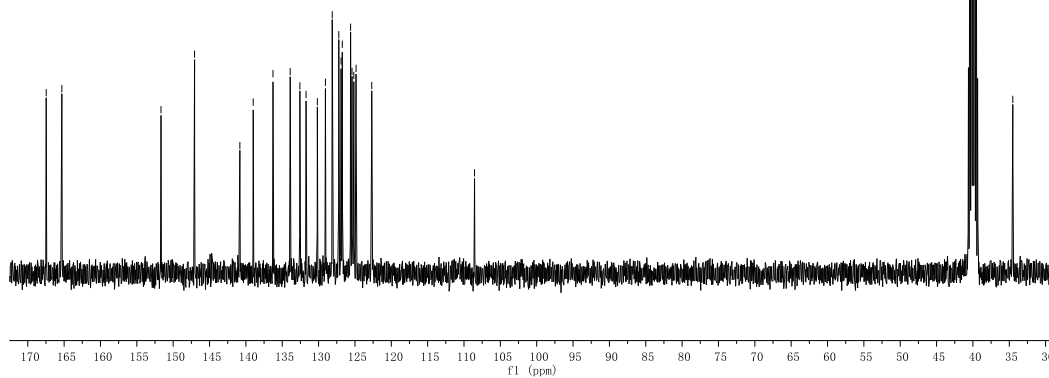

# HRMS

Xevo G2 Q-TOF/YCA166#

289 10 (0.199) Cm (10:16-(2:6+28:54))

10-Apr-2017

Waters

1: TOF MS ES-  
1.21e5

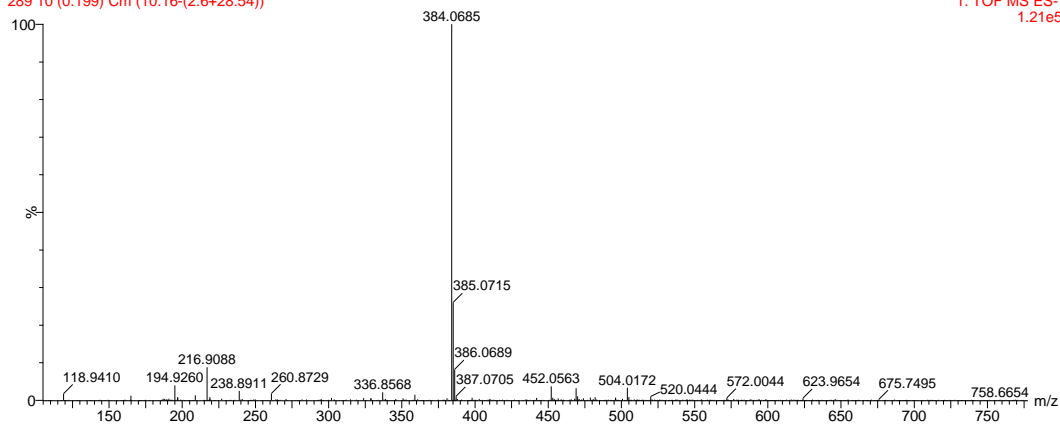



2-(4-(*tert*-Butyl) benzamido)-8,8-dimethyl-8*H*-indeno [2,1-*b*] thiophene-3-carboxylic acid (**52**)

<sup>1</sup>H-NMR

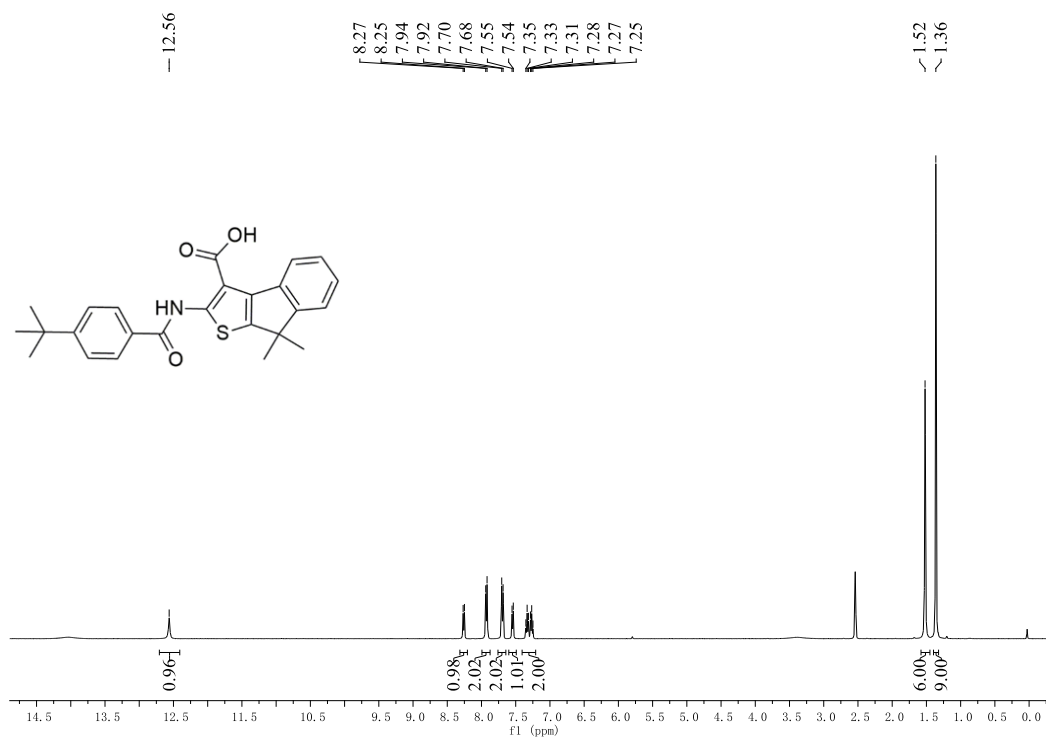

<sup>13</sup>C-NMR

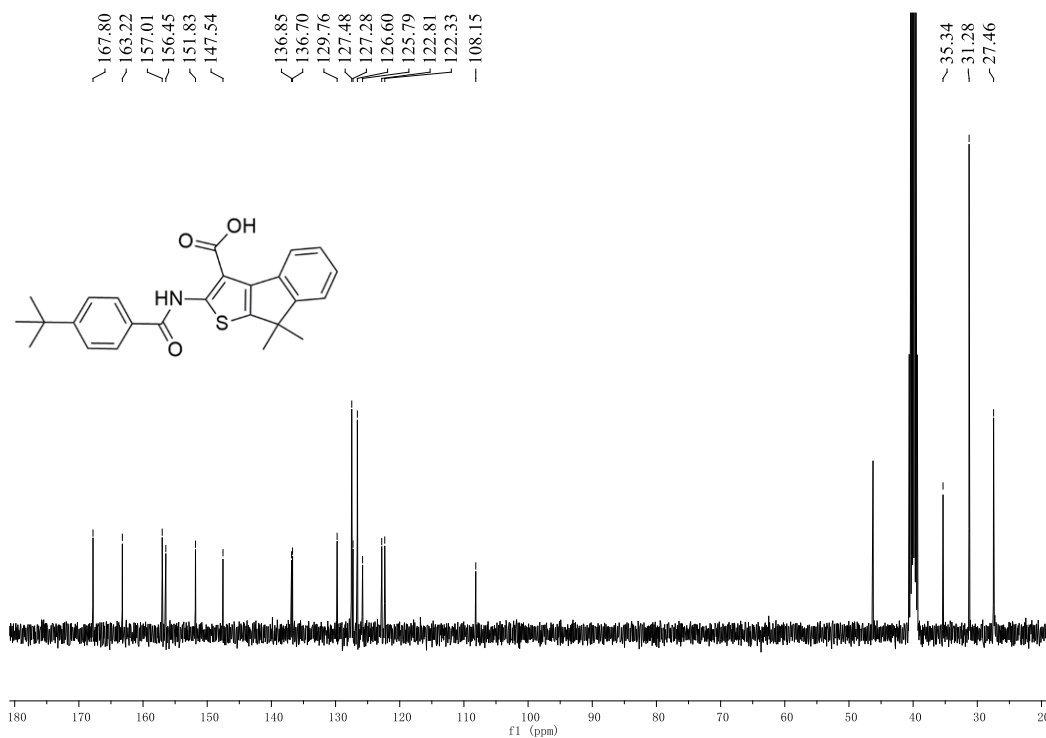

# HRMS

Xevo G2 Q-TOF/YCA166#

274 11 (0.216) Cm (11:15-(1:8+25:52))

10-Apr-2017

Waters

1: TOF MS ES-  
1.02e4

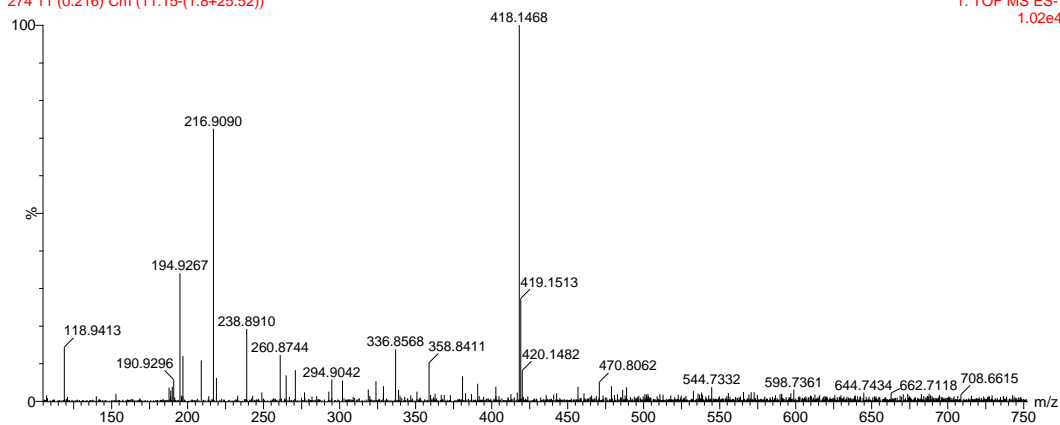

## 2-(4-(*tert*-Butyl) benzamido)-4,5-dihydronaphtho [2,1-*b*] thiophene-1-carboxylic acid (53)

### <sup>1</sup>H-NMR

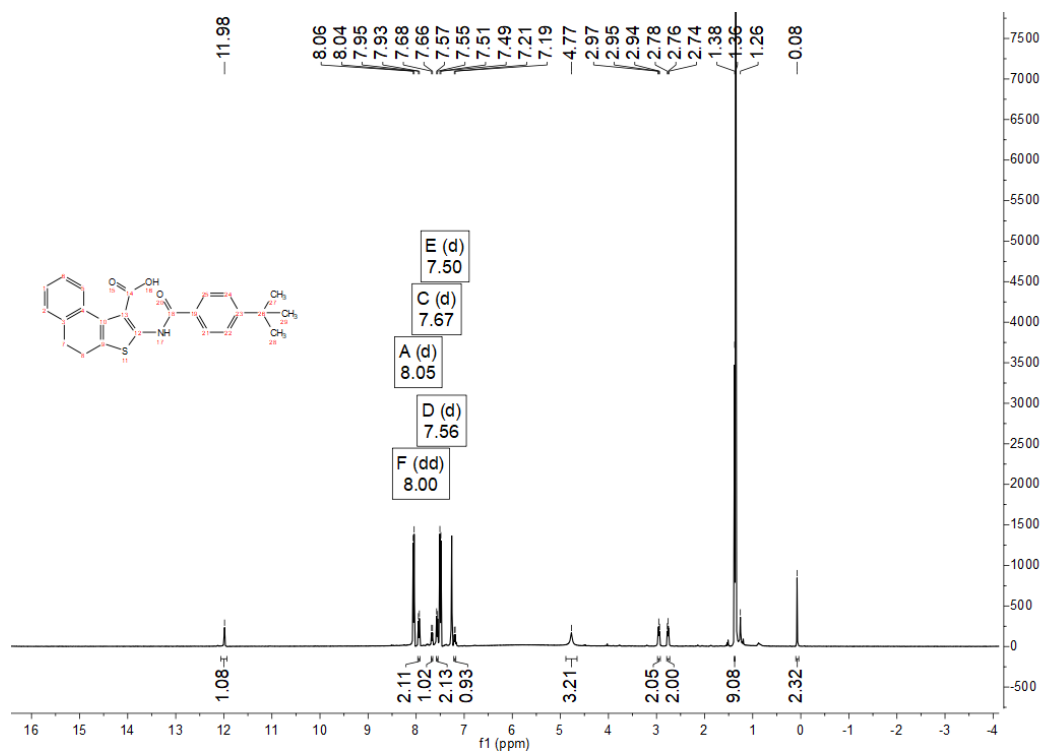

# <sup>13</sup>C-NMR

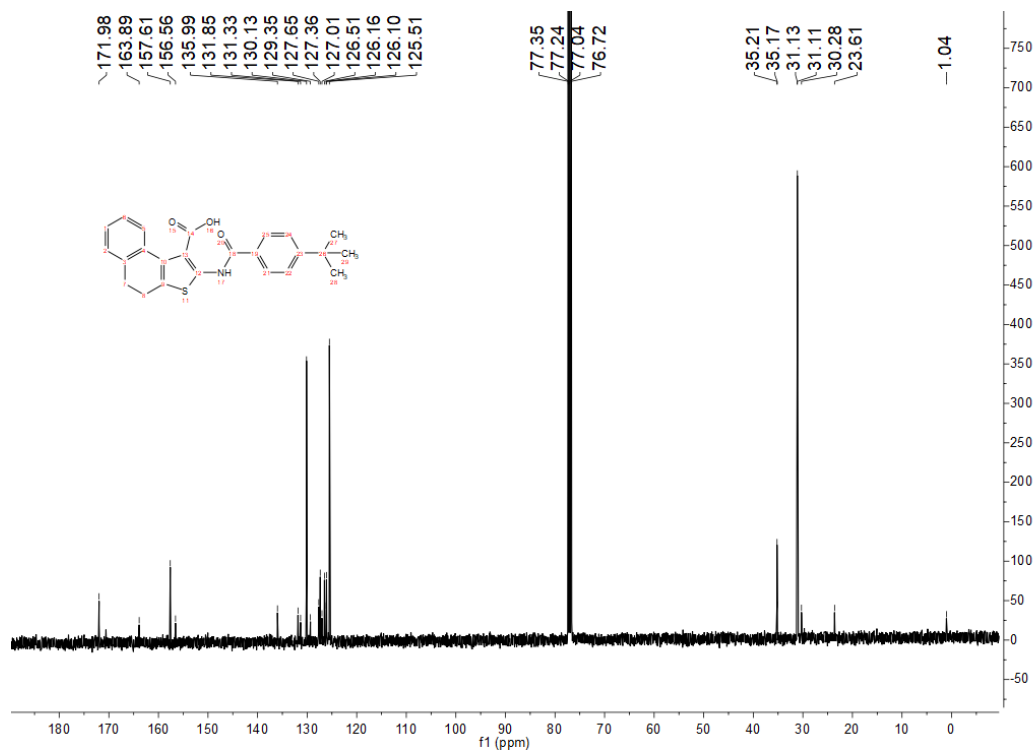

# HRMS

Xevo G2 Q-TOF/YCA166#

10-Apr-2017

Waters

275.12 (0.233) Cm (11:16-(1:6+25:53))

1: TOF MS ES-  
1.71e4

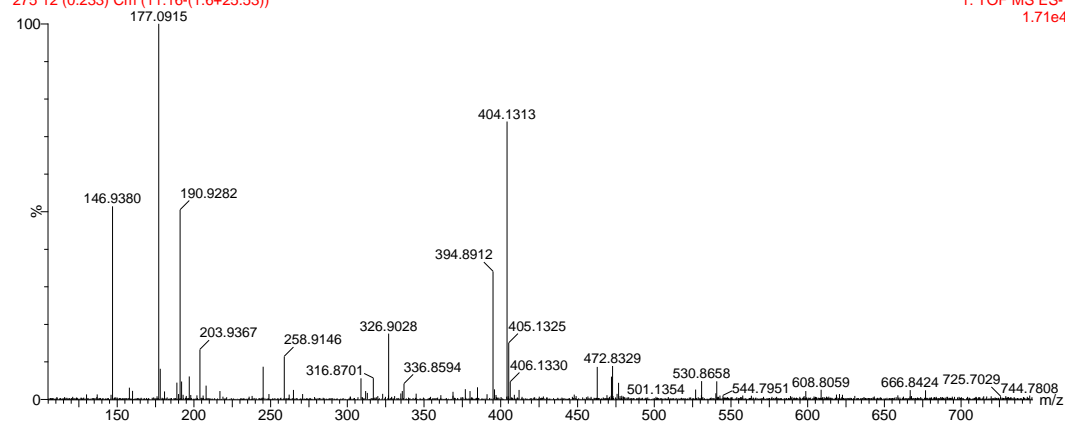

Supplement: mmc1.pdf [file mmc1.pdf]
